# Supplementary material
Source: PubMed Central journal article supplement (PMC8525335)
Supplement: bloodBLD2020007920-suppl1.pdf [file bloodBLD2020007920-suppl1.pdf]

## 1 **SUPPLEMENTAL METHODOLOGY**

### 2 **Lentiviral generation**

3 Lentiviral particles were generated following our optimized protocol.<sup>1</sup> In brief, HEK293T cells were  
4 plated overnight to reach 80-85% confluency on the next day. Cells were then co-transfected with the  
5 viral expression vector plus packaging plasmids (pMD2.G and psPAX2, Addgene) using Lipofectamine  
6 2000 (Life Technologies). At 48 h and 72 h thereafter, culture supernatants were collected and filtered  
7 through a 0.45-mm PVDF filter (Millipore). Viruses were further concentrated using PEG-it® Virus  
8 Precipitation Solution (System Biosciences).

9

### 10 **Plasmid generation**

11 *LOUP* cDNA in pCMV-SPORT6 plasmid (Dharmacon) was sub-cloned into the lentiviral pCDH-  
12 MSCV-MCS-EF1-copGFP expression vector that carries the copGFP marker (System Biosciences).  
13 Short hairpin RNAs (shRNA) targeting Renilla (shControl) and RUNX1-ETO (shRUNX1-ETO) were  
14 cloned into lentiviral vector containing GFP in an optimized 'miRE' context.<sup>2</sup> shRNA sequences are  
15 provided in Table S3.

16

### 17 **Generation of *LOUP*-depleted U937 cells (CRISPR/Cas9)**

18 In order to deplete *LOUP*, we employed CRISPR/Cas9 genome-editing platform which introduces  
19 small insertion and deletion (indel) mutations in the *LOUP* gene via the non-homologous end-joining  
20 (NHEJ) DNA repair mechanism.<sup>3,4</sup> FUCas9Cherry<sup>5</sup> (Addgene) was used as expression vector to  
21 generate mCherry-Cas9 lentiviral particles as described above. U937 cells were transduced with these  
22 particles using the TransDux® reagent (System Biosciences). Cas9-stable cells were then selected by  
23 several rounds of Fluorescence-activated cell sorting (FACS) sorting for mCherry positivity. *LOUP*-  
24 targeting sgRNAs were designed using Cas-Designer<sup>6</sup> and cloned into the pLVx U6se EF1a sfPac  
25 vector which carries eGFP (kind gift from Dr. Iannis Aifantis). To avoid disruption of the URE, known to

26 be critical for *PU.1* induction,<sup>7</sup> we designed single-guide RNAs (sgRNA) targeting two distinct regions of  
27 the *LOUP* gene: (1) the *LOUP* intronic area downstream of the URE, and (2) the intronic area  
28 immediately upstream of the second exon of the *LOUP* gene (~ 15 kb downstream from the URE).  
29 Cas9-stable cells were then transduced with eGFP-sgRNA lentiviruses. Cells expressing high levels of  
30 both eGFP and mCherry were FACS sorted, one cell per well, into 96-well plates. Genomic DNA from  
31 cell clones were isolated using DNeasy Blood & Tissue Kit kit (QIAGEN) and used for PCR amplifying  
32 CRISPR/Cas9 target sites. PCR products were sequenced and indel profile were analyzed by  
33 Inference of CRISPR edits (ICE) software.<sup>8</sup> Cell clones having homozygous indels were verified by  
34 Sanger sequencing. Primer and sgRNA sequences are provided in Table S3.

35

### 36 **Cord blood CD34<sup>+</sup> cell transduction and myeloid differentiation culture**

37 Isolation and lentiviral transduction of human cord blood CD34<sup>+</sup> cells were performed following  
38 described protocols.<sup>1,9</sup> Briefly, purified CD34<sup>+</sup> cells were cultured in expansion culture (IMDM  
39 supplemented with 20% BIT 9500 (Stem Cell Technologies, Vancouver), 100 ng/ml FLT3L, 100 ng/ml  
40 SCF, 100 ng/ml TPO, 20 ng/ml IL-6 - all from Peprotech, Cranbury)) and transduced with lentiviral  
41 particles using the TransDux® reagent (System Biosciences). Transduced cells were cultured in  
42 myeloid differentiation culture (IMDM with 20% BIT 9500 (Stem Cell Technologies, Vancouver), 100  
43 ng/ml SCF, 10 ng/ml FLT3L, 20 ng/ml IL-6, 20 ng/ml IL-3, 20 ng/ml GM-CSF, and 20 ng/ml G-CSF))  
44 and selected with 2 ug/ml puromycin. Cytospin slides of cultured cells were stained with Camco Stain  
45 Pak (Cambridge Diagnostic). Images were acquired with a Nikon Eclipse microscope, 60/0.80  
46 magnification and the SPOT Insight2 camera.

47

### 48 **Generation of CRISPR activation cells (CRISPRa)**

49 sgRNAs targeting the region 500 bp upstream of the *LOUP* transcriptional start site were designed  
50 using Cas-Designer.<sup>6</sup> The sgRNAs were then cloned into the pXR502 plasmid as previously  
51 described.<sup>10</sup> K562 cells stably expressing dCas9-VP64 were generated via lentiviral delivery of dCas9-  
52 VP64-Blast<sup>11</sup> and Blastidicin selection. dCas9-VP64 stable cells were transduced with lentiviruses that

53 packaged the sgRNA-cloned pXR502 plasmids as previously described.<sup>10</sup> One-day post-transduction,  
54 cells were selected with puromycin for 2-3 days before collection for analysis. sgRNA sequences are  
55 provided in Table S3.

56

### 57 **Plasmid transfections**

58 K562 cells, in exponential growth, were electroporated with expression plasmids using program  
59 T16, kit V (Lonza). Electroporated cells were incubated at 37°C overnight in a 5% CO<sub>2</sub> incubator. The  
60 next day, cells were changed to fresh medium. Cells were harvested at 48 h after electroporation.

61

### 62 **RUNX1-ETO inducible Tet-Off U937 cell culture**

63 U937 cells with conditional RUNX1-ETO expression was previously established.<sup>12,13</sup> Cells were  
64 stably transfected with the tetracycline transactivator (tTA) under the control of a tetracycline  
65 responsive element and pUHD RUNX1-ETO (also called pUHD-AML1/ETO or pUHD-CBF2T1). Cells  
66 were maintained in RPMI 1640 medium supplemented with 10% FBS, 1mM L-glutamine, 0.5 µg  
67 puromycin, 1 ug/ml G418, and 1 µg/ml of tetracycline. To induce RUNX1-ETO expression, cells were  
68 washed in with RPMI 1640 blank medium to remove tetracycline before being cultured for 48 h in the  
69 above-mentioned medium without tetracycline. Expression of RUNX1-ETO was confirmed by western  
70 blot using AML1 antibody (#4334, Cell Signaling Technology) that is capable of detecting both RUNX1  
71 and RUNX1-ETO.

72

### 73 **Cellular fractionation, RNA extraction, RT-PCR and qPCR analysis**

74 Cultured cells were washed with phosphate-buffered saline (PBS). Total RNA was extracted with  
75 Trizol reagent (Invitrogen) or PureLink™ RNA Mini Kit (Ambion) and treated with RNase-free DNase I  
76 (Roche) to remove contaminated genomic DNA. polyA<sup>-</sup> and polyA<sup>+</sup> RNAs were isolated from total RNA

77 using the Poly(A)Purist™ MAG Kit (Ambion) following manufacturer's protocol. Isolation of RNA from  
78 subcellular fractions was performed as previously described<sup>14</sup> with modifications. In brief, cells were  
79 lysed in cytosolic lysis solution (10 mM HEPES pH 7.9, 1.5 mM MgCl<sub>2</sub>, 10 mM KCl, 0.5 % NP40, 1 mM  
80 DTT plus protease and RNase inhibitors) for 10 minutes on ice. After centrifugation, the supernatant  
81 was collected as the cytoplasmic fraction for cytosolic RNA isolation. After washing in cytosolic lysis  
82 solution, the nuclear pellet was used for nuclear RNA isolation. To collect nucleoplasm and chromatin  
83 fractions, the nuclear pellet was further lysed with nuclear lysis solution (20 mM HEPES pH 7.9, 1.5 mM  
84 MgCl<sub>2</sub>, 450 nM NaCl, 0.2 mM EDTA, 25% glycerol, 1 mM DTT, plus protease and RNase inhibitors).  
85 After centrifugation, the nuclear-soluble fraction (nucleoplasm) was collected as supernatant and the  
86 chromatin-associated fraction was collected as the pellet. RNAs from collected fractions were extracted  
87 with Trizol reagent and treated with RNase-free DNase I (Roche).

88

89 For RT-PCR, RNA was reverse-transcribed by using the SuperScript® III Reverse Transcriptase  
90 (Invitrogen). Red Taq Pro Complete (Denville Scientific) was used to amplify designated amplicons. For  
91 qPCR assays, cDNA was generated by the QuantiTect Rev. Transcription Kit (Qiagen) which also  
92 includes additional DNA contamination removal. iQ SYBR Green Supermix (Biorad) was used for PCR  
93 quantitation in a RotorGene cycler (Corbett). Relative quantification was performed using the ddCt  
94 method.<sup>15</sup> To calculate *LOUP* transcript numbers per cell, *LOUP* DNA fragments amplified by RT-PCR  
95 from HL-60 cDNA were cloned into the pSCampKan plasmid (Agilent). *LOUP* RNA fragments were *in*  
96 *vitro*-transcribed by using a MAXIscript™ Transcription Kit (Ambion). The RNA fragments were used to  
97 generate a standard curve for absolute quantification in qRT-PCR assays. Primers and probes used for  
98 all PCR assays are provided in Table S3.

99

100

101

102 **Fluorescence-activated cell sorting and analysis**

103 Cell populations were isolated for RNA extraction as previously described.<sup>16</sup> Briefly, mononuclear  
104 cells were isolated from bone marrow, spleen and peripheral blood after lysing red blood cells with ACK  
105 lysis buffer.<sup>17</sup> Single cell suspensions were stained with fluorochrome-conjugated antibodies (Biolegend  
106 and eBioscience) and FACS-sorted based on the following markers. LT-HSC: Lin<sup>-</sup>c-Kit<sup>+</sup>Sca-  
107 1<sup>+</sup>CD150<sup>+</sup>CD48<sup>-</sup>; ST-HSC: Lin<sup>-</sup>c-Kit<sup>+</sup>Sca-1<sup>+</sup>CD150<sup>-</sup>CD48<sup>+</sup>; LMPP: Lin<sup>-</sup>c-Kit<sup>+</sup>Sca-1<sup>+</sup>CD34<sup>+</sup>Flt3<sup>+</sup>; MEP: Lin<sup>-</sup>  
108 c-Kit<sup>+</sup>Sca-1<sup>-</sup>CD34<sup>-</sup>CD16/32<sup>-</sup>; CMP: Lin<sup>-</sup>c-Kit<sup>+</sup>Sca-1<sup>-</sup>CD34<sup>+</sup>CD16/32<sup>-</sup>; GMP: Lin<sup>-</sup>c-Kit<sup>+</sup>Sca-1<sup>-</sup>  
109 CD34<sup>+</sup>CD16/32<sup>+</sup>; Myeloid: Mac1<sup>+</sup>Gr1<sup>+</sup>. Myeloid surface marker staining and FACS analysis were  
110 performed following previously described procedures.<sup>18</sup> Cells were stained with PACBLUE-CD11b  
111 (BioLegend). Stained cells were analyzed using LSRII flow cytometer (BD Biosciences) and FlowJo  
112 software (Tree Star)

113

114 **Transcript mapping by P5-linker ligation and 3' RACE**

115 The 5' end of the *LOUP* transcript was identified using the P5-linker ligation method as described  
116 previously.<sup>19</sup> Briefly, single-stranded cDNAs were generated from HL-60 polyA<sup>+</sup> RNA by using  
117 SuperScript III reverse transcriptase (Life Technologies) with *LOUP*-specific nested primer #1. Double-  
118 strand cDNAs were then synthesized from single-stranded cDNA using a SuperScript™ Double-  
119 Stranded cDNA Synthesis Kit (Life Technologies) and blunt-ended by NEBNext End Repair Enzym  
120 Module (New England Biolabs). After purification, these cDNAs were ligated with the P5-splinkerette  
121 adapter and purified. All purification steps were done by using QIAquick PCR Purification Kit (QIAGEN).  
122 Ligated products were then purified and used as templates for PCR using a P5 primer and *LOUP*-  
123 specific nested primers #1 and #2 with Phusion Hot Start DNA polymerase (Finnzymes). P5-linker  
124 ligation products were gel purified using a QIAGEN Gel Extraction Kit (QIAGEN), sub-cloned into the  
125 pSCampKan vector, and transformed into competent bacteria using a StrataClone Blunt PCR Cloning  
126 Kit (Agilent). The 3'RACE assay was performed using a 2<sup>nd</sup> Generation 5'/3' RACE Kit (Roche)  
127 according to manufacturer's instructions. In brief, cDNA was generated from HL-60 polyA<sup>+</sup> RNA using

128 oligo(dT)-anchor primer mix. Overlapping RACE products were then amplified from cDNA using an  
129 anchor primer and *LOUP*-specific primers. RACE products were sub-cloned into the pSCampKan  
130 vector and transformed into competent bacteria using a StrataClone Cloning Kit (Agilent). Plasmids  
131 containing P5-linker and RACE products were purified from bacteria, sequenced, and assembled.  
132 Primer information is in Table S3.

133

### 134 **Northern blotting**

135 10 ug polyA<sup>-</sup> and polyA<sup>+</sup> RNAs were dissolved and heat denatured in sample buffer containing  
136 formamide, MOPS and formaldehyde. Denatured RNAs were separated on a 1% denaturing agarose  
137 gel containing formaldehyde, MOPS and EtBr, before being transferred to Brightstar-plus positively  
138 charged nylon membrane (Life Technologies). The *LOUP* probe was PCR amplified with primers  
139 described in Table S3. The PCR product was sub-cloned into cloned into the pSCampKan vector using  
140 a StrataClone PCR Cloning Kit (Agilent). The probe sequence was verified by Sanger sequencing. The  
141 probe was released from the vector by restriction enzyme digestion and gene purification. The *LOUP*  
142 probe was radiolabeled using the Random Primed DNA Labeling Kit (Roche). Northern blot analysis  
143 was performed with ExpressHyb™ Hybridization Solution (Clontech) following the manufacturer's  
144 protocol.

145

### 146 **Quantitative Chromosome Conformation Capture (3C-qPCR)**

147 3C-qPCR experiments were performed by adapting described methods.<sup>20-22</sup> Briefly, 1x10<sup>6</sup> cells  
148 were crosslinked using 1% formaldehyde in PBS at room temperature for 10 minutes. The crosslinking  
149 reaction was stopped by adding 0.125 M Glycine and incubated for 5 minutes at room temperature  
150 followed by 15 minutes on ice. Crosslinked cells were then washed with ice-cold PBS and lysed in 3C  
151 lysis buffer (10 mM Tris-HCl, pH 8.0; 10 mM NaCl; Igepal CA-630 0.2% (vol/vol); 1X protease inhibitor  
152 cocktail (Sigma)) with 15 Dounce homogenizer strokes. After centrifugation, nuclear pellets were

153 washed in 1x restriction enzyme buffer before being lysed with 0.1% SDS in 1x restriction enzyme  
154 buffer at 65°C for 10 minutes. After incubation, the chromatin solution was supplemented with 1%  
155 Triton X-100 and digested by Apol restriction enzyme (New England Biolabs) at 37°C overnight with  
156 rotation. The following day, 1.5% SDS was added to the reaction and enzyme activity was inhibited by  
157 incubating at 65°C for 30 minutes. Nearby DNA ends of digested chromatin were joined by T4-ligase  
158 (New England Biolabs) at 16°C for 2 h. Bound proteins, including histones, were removed by  
159 proteinase K digestion at 65°C overnight. The DNA library was extracted by phenol/chloroform using  
160 phase-lock gel tubes (5PRIME) and ethanol precipitation. RNA was removed by incubating 3C libraries  
161 with RNase A (Lucigen) at 37°C for 15 minutes. TaqMan real-time PCR quantifications of ligation  
162 products were performed, using primers and probes as documented in Table S3.

163

#### 164 **Chromatin Isolation by RNA Purification (ChIRP)**

165 ChIRP assays were performed as previously described<sup>23,24</sup> with additional modifications. Briefly, to  
166 preserve RNA-chromatin interactions, cells were first crosslinked with 2 mM EGS at room temperature  
167 for 45 minutes. After washing cells with ice-cold PBS, cells were further crosslinked with 3%  
168 paraformaldehyde for 15 minutes at room temperature. The crosslinking reaction was quenched with  
169 0.125 M glycine for 5 minutes at room temperature. Crosslinked cells were washed in ice-cold PBS and  
170 lysed in sonication buffer (20 mM Tris pH 8, 150 mM NaCl, 0.1% SDS, 1% Triton-X, 2 mM EDTA, 1 mM  
171 PMSF) supplemented with cOmplete™, Mini Protease Inhibitor Cocktail (Sigma-Aldrich) and  
172 SUPERase In RNase Inhibitor (Invitrogen). After sonication and centrifugation, the supernatant  
173 containing sheared chromatin was collected and incubated with biotinylated anti-sense DNA tiling  
174 probes in hybridization buffer (750 mM NaCl, 1% Triton, 0.1% SDS, 50 mM Tris-Cl pH 7.0, 1 mM  
175 EDTA, 15% formamide, 1 mM PMSF) supplemented with cOmplete™, Mini Protease Inhibitor Cocktail  
176 and SUPERase In RNase Inhibitor. Hybridized chromatin fragments were captured using Dynabeads™  
177 MyOne™ Streptavidin C1 (Invitrogen). Captured chromatin fragments was either used for extracting  
178 chromatin-bound RNA by Trizol reagent or for DNA isolation. Chromatin-bound *LOUP* was quantitated

179 from chromatin-bound RNA by qRT-PCR. Enrichment of the URE and the PrPr were evaluated by  
180 qPCR. Probes used in the ChIRP assay were designed using the online probe designer at  
181 [singlemoleculefish.com](http://singlemoleculefish.com) and are listed in Table S3.

182

### 183 **DNA pull-down assay (DNAP)**

184 DNAP was performed as described previously with minor modifications.<sup>25</sup> Briefly, the nuclear extract  
185 was pre-cleared with Dynabeads™ MyOne™ Streptavidin C1 for 30 minutes at 4°C then incubated  
186 overnight with biotinylated oligonucleotides in binding buffer (10 mM HEPES pH 7.9; 100 mM KCl, 5  
187 mM MgCl<sub>2</sub>, 1 mM EDTA, 10% glycerol, 1 mM DTT, 0.5% NP-40, 1 mM DTT) supplemented with 1x  
188 protease inhibitor cocktail (Sigma-Aldrich). Beads were washed with binding buffer then added to the  
189 binding reaction. After 1-hour incubation, beads were washed five times with binding buffer. DNA-  
190 bound proteins were eluted from beads and subjected to SDS-PAGE and immunoblotting.

191

### 192 **RNA pull-down assay (RNAP) and RNA-Protein interaction prediction**

193 RNAP were performed essentially as described previously<sup>26</sup> with few modifications. Briefly,  
194 biotinylated RNA was *in vitro*-transcribed using the MAXIscript™ Transcription Kit (Ambion). The DNA  
195 template was removed by DNaseI treatment. Transcribed RNA was purified using a RNeasy Mini Kit  
196 (QIAGEN). Purified RNA was denatured by heating to 90°C for 2 minutes following incubation on ice for  
197 2 minutes in RNA structure buffer (10 mM Tris pH 7, 0.1 M KCl, 10 mM MgCl<sub>2</sub>). Denatured RNA was  
198 then shifted to room temperature for 20 minutes to form proper secondary structure. Nuclear extracts  
199 were treated with RNase-free DNase I (Roche) to remove genomic DNA and pre-cleared with  
200 Dynabeads™ MyOne™ Streptavidin C1 or Streptavidin agarose beads (Invitrogen) in binding buffer I  
201 (150 mM KCl, 25 mM Tris pH 7.4, 0.5 mM DTT, 0.5% NP40, 1 mM PMSF) supplemented with  
202 cComplete™, Mini Protease Inhibitor Cocktail, and SUPERase In RNase Inhibitor. Pre-cleared extracts  
203 were then incubated with biotinylated RNAs in binding buffer I for 1 hour. Beads were washed with



204 binding buffer I then added to the binding reaction. After 1-hour incubation, beads were washed five  
205 times with binding buffer I. RNA-bound proteins were eluted from beads and subjected to SDS-PAGE  
206 and immunoblotting. For recombinant proteins (full-length RUNX1 (OriGene Technologies), and Runt  
207 domain (MyBiosource)), binding buffer II (50 mM Tris-Cl 7.9, 10% Glycerol, 100 mM KCl, 5 mM MgCl<sub>2</sub>,  
208 10 mM β-ME, and 0.1% NP-40) was used.

209 *In silico* prediction of RNA-Protein interactions were performed using the catRAPID Fragments  
210 algorithm in which protein-RNA interaction propensities were predicted based on calculation of  
211 secondary structure, hydrogen bonding, and van der Waals contributions.<sup>27</sup> To identify RIP-seq peaks  
212 containing sequences similar to R1 or R2, a .bed file with coordinates and peak IDs was prepared.  
213 FASTA nucleotide sequences corresponding to the peaks were extracted by getfasta algorithm within  
214 The BEDtools suite.<sup>28</sup> Output files were as input for blast2sequences (<http://blast.ncbi.nlm.nih.gov/>).  
215 Top blast hits were analyzed using catRAPID against RUNX1.

216

### 217 **RNA Immunoprecipitation sequencing and qPCR (RIP-seq and RIP-qPCR)**

218 RIP was performed following a protocol reported by Hendrickson et al<sup>29</sup> with modifications. Briefly,  
219 cells were crosslinked in 0.1% formaldehyde at room temperature for 10 minutes. The crosslinking  
220 reaction was quenched for 5 min at room temperature with 0.125 M glycine. Crosslinked cells were  
221 washed with ice-cold PBS. Cell pellet was lysed in RIPA lysis buffer (50 mM Tris (pH 8), 150 mM KCl,  
222 0.1 % SDS, 1 % Triton-X, 5 mM EDTA, 0.5 % sodium deoxycholate, 0.5 mM DTT) supplemented with  
223 protease inhibitor cocktail (Thermo Scientific) and 100 U/ml RNaseOUT™ (Invitrogen). After sonication,  
224 cell lysate was pre-cleared by incubating with Dynabeads® Protein G (Invitrogen). Beads were then  
225 captured and removed using a magnet. Pre-cleared lysate was incubated with anti-RUNX1 antibody or  
226 IgG (Abcam) at 4°C for 2 hours before adding 50 µl of Dynabeads® Protein G to capture antibodies.  
227 After washing, beads were kept at -20°C or proceeded to incubation with reverse-crosslinking buffer (3×  
228 PBS (without Mg or Ca), 6% N-lauroyl sarcosine, 30 mM EDTA, 15 mM DTT) supplemented with  
229 Proteinase K (Ambion) and RNaseOUT together with the input sample. Captured RNAs were extracted

230 with Trizol reagent. Contaminated DNA was removed from extracted RNA by DNaseI from RNase-Free  
231 DNase Set (QIAGEN) then ribosomal RNA was removed using the Ribo-Zero™ Magnetic Gold Kit  
232 (Epicentre). RNA was further purified using RNeasy MinElute Cleanup Kit (QIAGEN). RNA quality was  
233 determined using the RNA 6000 Pico Kit on a Bioanalyzer (Agilent). Purified RNA was used for qRT-  
234 PCR as described elsewhere and cDNA library construction using the Truseq stranded total RNA  
235 library prep kit (Illumina) according to the manufacturer's protocol. The libraries were pooled together  
236 and subjected to pair-end sequencing on a Nextseq500 (Illumina) to achieve 2×40 bp reads.

237

### 238 **Chromatin Immunoprecipitation and qPCR (ChIP-qPCR)**

239 ChIP was performed as previously described.<sup>30</sup> Briefly, 2x10<sup>6</sup> U937 cells were crosslinked with 1%  
240 formaldehyde (formaldehyde solution, freshly made: 50 mM HEPES-KOH; 100 mM NaCl; 1 mM EDTA;  
241 0.5 mM EGTA; 11% formaldehyde) for 10 minutes at room temperature. The crosslinking reaction was  
242 stopped by incubating with 0.125 M glycine for 5 minutes at room temperature. Crosslinked cells were  
243 washed twice with ice-cold PBS (freshly supplemented with 1 mM PMSF). The cell pellet was then  
244 lysed for 10 minutes on ice and chromatin was fragmented by sonication (25 cycles, 30 seconds on, 60  
245 seconds off, high power, Bioruptor). The chromatin solution was incubated with 10 µg antibody  
246 overnight at 4°C. Protein A magnetic beads (NEB) were used to capture antibody-bound chromatin.  
247 After washing, chromatin was reverse-crosslinked and treated with proteinase K overnight at 65°C.  
248 Beads were then removed using a magnet and the chromatin solution was treated with RNase  
249 treatment (Epicentre) for 30 minutes at 37°C. ChIP DNA was extracted with Phenol:Chloroform:Isoamyl  
250 Alcohol 25:24:1, pH:8 (Sigma-Aldrich) and then precipitated with an equal volume of isopropanol in the  
251 presence of glycogen. The DNA pellet was dissolved in 30 µl of TE buffer for qPCR analyses. Fold  
252 enrichment was calculated using the formula  $2^{(-\Delta\Delta Ct(\text{ChIP}/\text{IgG}))}$ . Primer sets used for ChIP-qPCR are listed  
253 in Table S3.

254

255 **RIP-seq and CHIP-seq data analyses**

256 RIP-seq samples were demultiplexed. Reads were deduplicated by Clumpify from the BBtools  
257 suite, sourceforge.net/projects/bbmap/) with the parameters “dedupe spany addcount”. Adaptor quality  
258 trimming and filtering was performed by BBDuck from the BBtools suite with the parameters “ktrim=l  
259 hdist=2”. Low quality reads/bases were removed by Trimmomatic<sup>31</sup> with the parameters: “LEADING:28  
260 SLIDINGWINDOW:4:26 TRAILING:28 MINLEN:20”. The processed reads were then aligned to Human  
261 genome build 38 (hg38) by the STAR aligner<sup>32</sup> with the parameters “--outFilterScoreMinOverLread  
262 0.05 --outFilterMatchNminOverLread 0.05 --outFilterMultimapNmax 30 --outSAMprimaryFlag  
263 AllBestScore”. Coverage maps were generated using bamCoverage (part of the deepTools suite<sup>33</sup> with  
264 default parameters. Peak calling was performed using HOMER (v4.10).<sup>34</sup> RUNX1 peaks with at least  
265 two-fold enrichment over IgG control were selected for annotation using HOMER. Peaks were assigned  
266 to a gene locus by satisfying at least one of the following location criteria: a nearest transcription start  
267 site, on a promoter, or on a transcript body. Ensemble 97 human gene CRCh38.p12 was used to  
268 retrieve gene annotation information through Biomart in Ensembl.<sup>35</sup> For CHIP-seq and Dnase-seq data,  
269 raw reads were downloaded from GEO (RUNX1 CHIP-seq in THP-1 cells: GSM2108052; RUNX1-ETO  
270 and H3K9Ac CHIP-seq, and Dnase-seq in Kasumi-1: GSE29222). Read quality were evaluated by  
271 FastQC.<sup>36</sup> Where necessary, reads with low-quality were trimmed by trim\_galore.<sup>37</sup> Genome alignment,  
272 coverage maps, and peak calling were performed using software packages as above. CHIP-seq peaks  
273 with at least ten-fold enrichment over surrounding 10 kb region were selected for annotation using  
274 HOMER. BigWig files were uploaded and viewed via the UCSC genome browser.

275  
276 The following gene tracks were from published data deposited in GEO and were processed via the  
277 Cistrome pipeline.<sup>38</sup> H3K27ac overlay track includes monocytes (GSM2679933), THP-1  
278 (GSM2544236), and HL-60 (GSM2836486). The H3K4me1 overlay track includes monocyte  
279 (GSM1435532), HL-60 (GSM2836484) and THP-1 (GSM3514951). H3K4me3 overlay track includes  
280 monocytes (GSM1435535), HL-60 (GSM945222), and THP-1 (GSM2108047). The DNase-seq overlay

281 track includes monocytes (GSM701541) and HL-60 (GSM736595). RUNX1 ChIP-seq tracks include  
282 CD34<sup>+</sup> cells from healthy donors (GSM1097884), and an AML patient with FLT3-ITD and no other  
283 defined mutations (GSM1581788). The CAGE track (reverse strand and max counts) was imported  
284 from the FANTOM5 project.<sup>39</sup>

285

### 286 **RNA sequencing data analysis (RNA-seq)**

287 Raw sequencing reads (FASTQ files) of the Human Body Map data set were downloaded from  
288 AEAArrayExpress (E-MTAB-513). Read quality was assessed by FastQC.<sup>36</sup> Reads with low-quality were  
289 trimmed by trim\_galore.<sup>37</sup> The *LOUP* transcript was integrated into the Ensembl human cDNA catalog  
290 GRCh38 and transcript levels were quantified against this catalog using the Salmon software.<sup>40</sup> AML  
291 RNA-seq were downloaded from TCGA and transcript counts were determined. For RNA-seq track  
292 visualization, the following RNA-seq raw data were downloaded from GEO: THP-1 (GSM1843218), HL-  
293 60 (GSM1843216), CD34<sup>+</sup> HSPC (GSM1843222), Monocyte (GSM1843224), and Jurkat  
294 (GSM2260195). BigWig files were generated using packages as described in ChIP-seq and RIP-seq  
295 analyses and viewed via the UCSC genome browser.

296

### 297 **Single-cell RNA-seq (scRNA-seq) data analyses**

298 Raw fastq files data of mononuclear cells isolated from peripheral blood and bone marrow were  
299 obtained from the 10x Genomics public datasets repository  
300 (<https://www.10xgenomics.com/resources/datasets/>) and pooled together to maximize coverage of  
301 hematopoietic cell lineages. Transcripts were mapped to the human transcriptome using Cell Ranger  
302 (10x Genomics) with a custom hg38 gtf containing the *LOUP* transcript details. Subsequent analyses  
303 were performed in R (v3.6.2) using the previously published Bioconductor workflow with minor  
304 modifications.<sup>41</sup> Filtering criteria were as below. First, cells with library sizes more than three median  
305 absolute deviations (MADs) below the median library or four MAD's above the median library size were

306 filtered out. Second, cells with a total number of expressed genes ( $\geq 1$  read) more than three MADs  
307 below the median total number of expressed genes or four MAD's above the median total number of  
308 expressed genes were filtered out. Third, cells with a total percentage of expressed genes originating  
309 from mitochondrial DNA more than eight MADs above the median were filtered out. A doublet score  
310 was then computed to estimate the percentage of barcodes for two or more cells as previously  
311 described.<sup>42</sup> Cells with a doublet score of 0.99 were excluded. Expression of each cell was normalized  
312 by a size factor approach as previously described<sup>43</sup> resulting in  $\log_2(\text{normalize\_expression})$  values.  
313 Principle component and t-Distributed Stochastic Neighbor Embedding (tSNE) analyses revealed no  
314 significant batch effects to be regressed out for the samples. To account for dropouts which are found  
315 more frequently for genes with lower expression magnitude in scRNA-seq,<sup>44</sup> cells with undetectable  
316 *LOUP* and *PU.1* transcripts were referred as *LOUP<sup>-</sup>IPU.1<sup>-</sup>* and cells with detectable *LOUP* and *PU.1*  
317 transcripts were referred as *LOUP<sup>+</sup>IPU.1<sup>+</sup>*. Expression data visualization was performed using SPRING  
318 software.<sup>45</sup> Briefly, a graph of cells connected to their nearest neighbors in gene expression space was  
319 determined. This was then projected into two dimensions using a force-directed graph layout. Identity of  
320 each cell was inferred using the Blueprint-Encode annotation which includes normalized expression  
321 values of 259 bulk RNA-seq samples generated from pure and defined cell populations.<sup>46,47</sup> This  
322 annotation was integrated in the SingleR R package.<sup>48</sup> Annotated cells were grouped into major  
323 definitive cell lineages as described in the text. Gene Ontology (GO) analysis was performed using the  
324 Database for Annotation, Visualization and Integrated Discovery functional annotation tool  
325 (<http://david.abcc.ncifcrf.gov>). Significance of over-represented Gene Ontology biological processes  
326 was examined based on  $-\log_{10}$  of corrected *p*-values from Bonferroni-corrected modified Fisher's exact  
327 test.<sup>49</sup> A list of enriched genes in *LOUP<sup>+</sup>IPU.1<sup>+</sup>* group vs. *LOUP<sup>-</sup>IPU.1<sup>-</sup>* group was generated using  
328 SPRING software.<sup>45</sup> Upregulated genes (*Z*-score  $>1$ ) was used for GO analysis.

329

330

331

332 **Prediction of coding potential with PhyloCSF**

333 The cross-species multiple sequence comparisons result of 46 species (i.e., multiz100way) was  
334 downloaded from the UCSC genome browser (<https://genome.ucsc.edu>). Guided by the GENCODE  
335 gene annotation (ver. 28), the alignment of the longest isoform of each gene was extracted from  
336 alignments of cross-species multiple sequence comparisons. The alignment was analyzed by  
337 PhyloCSF<sup>50</sup> with 58mammals mode. All possible coding reading frames on the same strand were  
338 scanned. The maximal score was used.

339

340 **SUPPLEMENTAL FIGURES**

**A****RIP workflow**

Cell crosslink with 0.1% formaldehyde

Cell lysis and sonication

Immunoprecipitation with Ab for 4 h

Capture of Ab with magnetic beads

Reverse crosslinking and RNA isolation

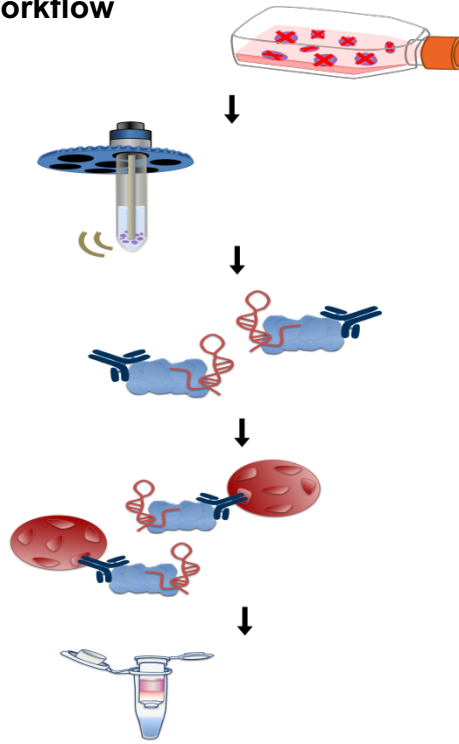**B**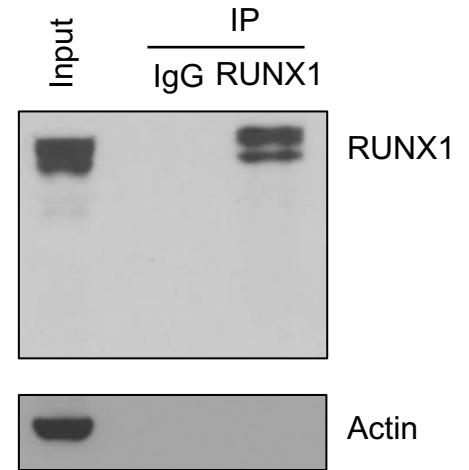**C****Immunoprecipitated RNA analysis**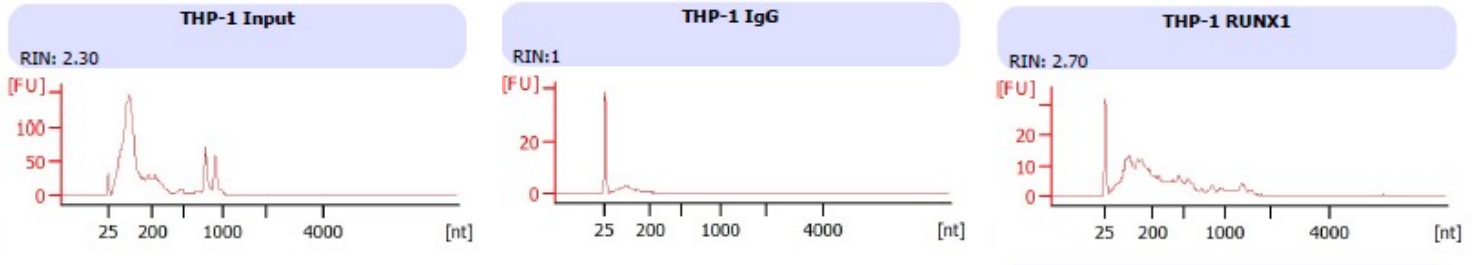**D****RUNX1 RIP-seq and ChIP-seq flowchart (THP-1 cells)****RUNX1 RIP-seq**hg38 GRCh38.p12  
(226,950 transcripts)**RUNX1 ChIP-seq**  
(GSE79899)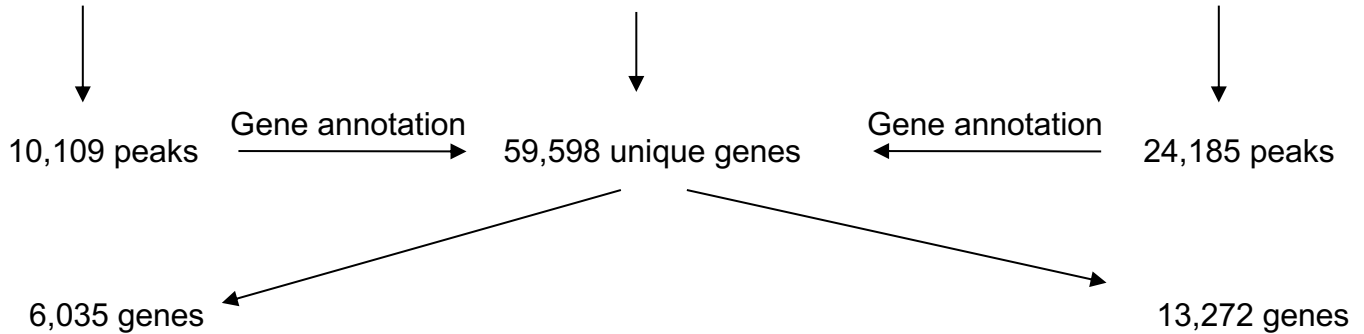

**E****RIP-seq, THP-1 cells**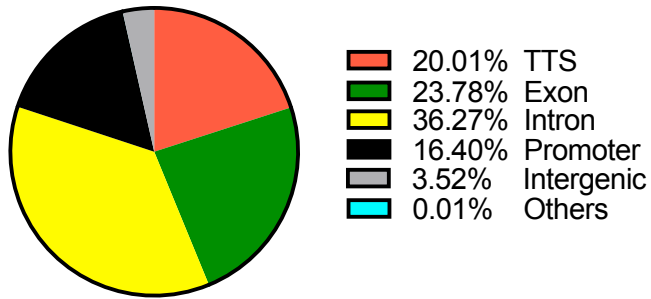

Total=10109

**F****ChIP-seq, THP-1 cells**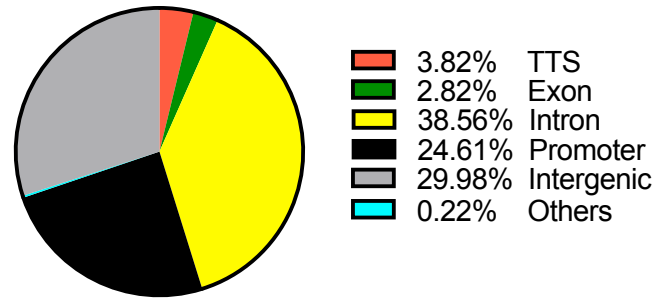

Total=24185

**G**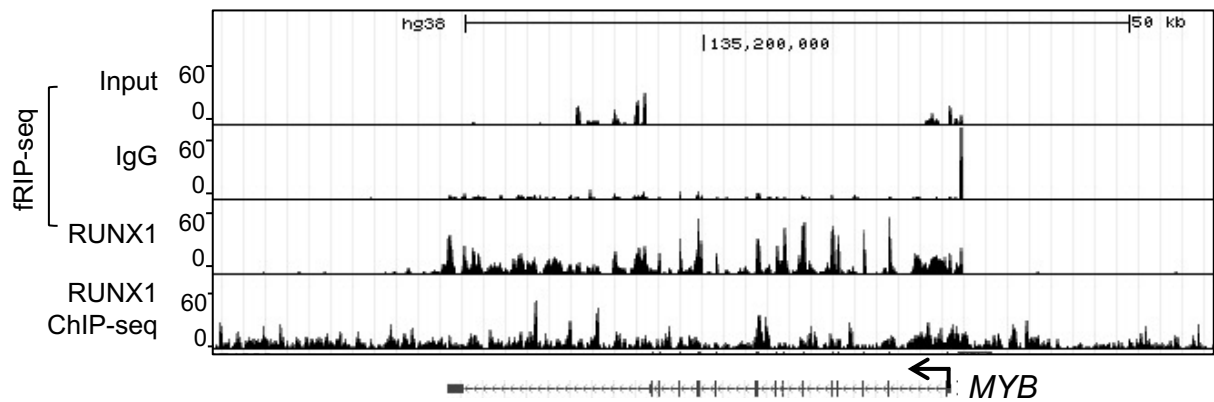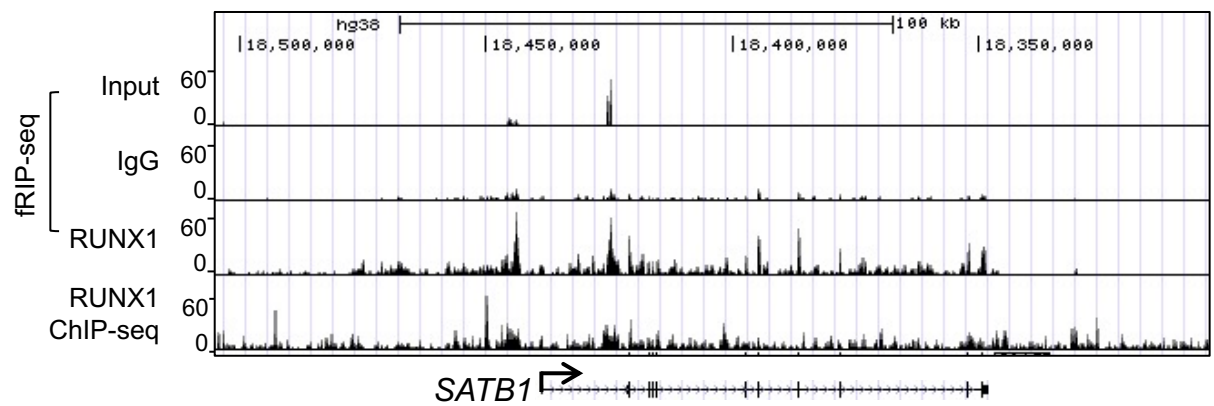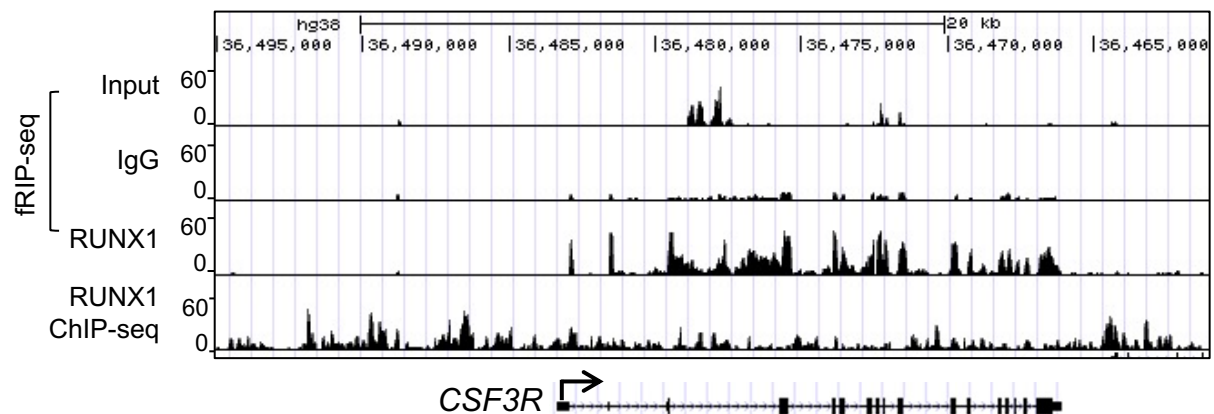**FigS1**



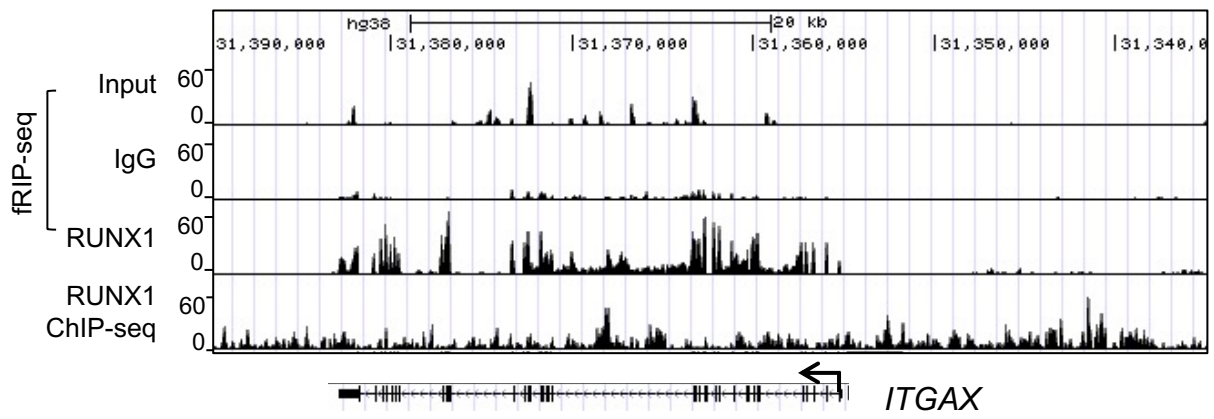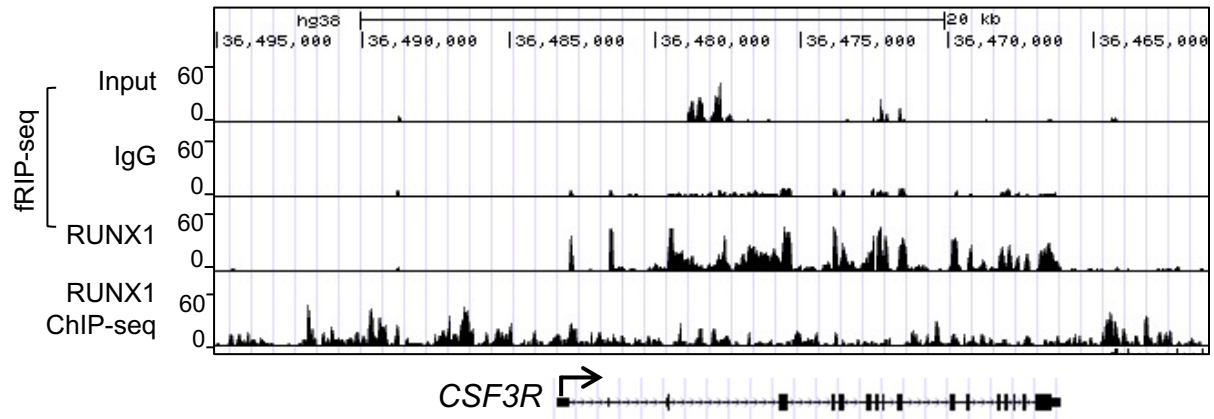

**FigS1**

341 **Figure S1. Identification of gene loci exhibiting concurrent RUNX1-RNA and -DNA interactions,**

342 **Related to Figure 1**

343 (A) Workflow of RUNX1-RIP procedure. Ab: antibody.

344 (B) Immunoblot detection of RUNX1 and actin proteins immunoprecipitated from THP-1 cell lysate  
345 using anti-RUNX1 antibody and Rabbit IgG isotype control.

346 (C) Bioanalyzer analysis of RNAs captured by anti-RUNX1 antibody and IgG control plus input RNAs.

347 (D) Analysis flowchart of RUNX1 RIP-seq and ChIP-seq analyses.

348 (E and F) Pie charts showing distribution of RUNX1 RIP-seq peaks and RUNX1 ChIP-seq peaks at  
349 different genomic locations.

350 (G) Examples of the myeloid gene loci having both RUNX1 RIP peaks and RUNX1 ChIP-seq peaks  
351 from THP-1 cells.

**A****Exon junction verification**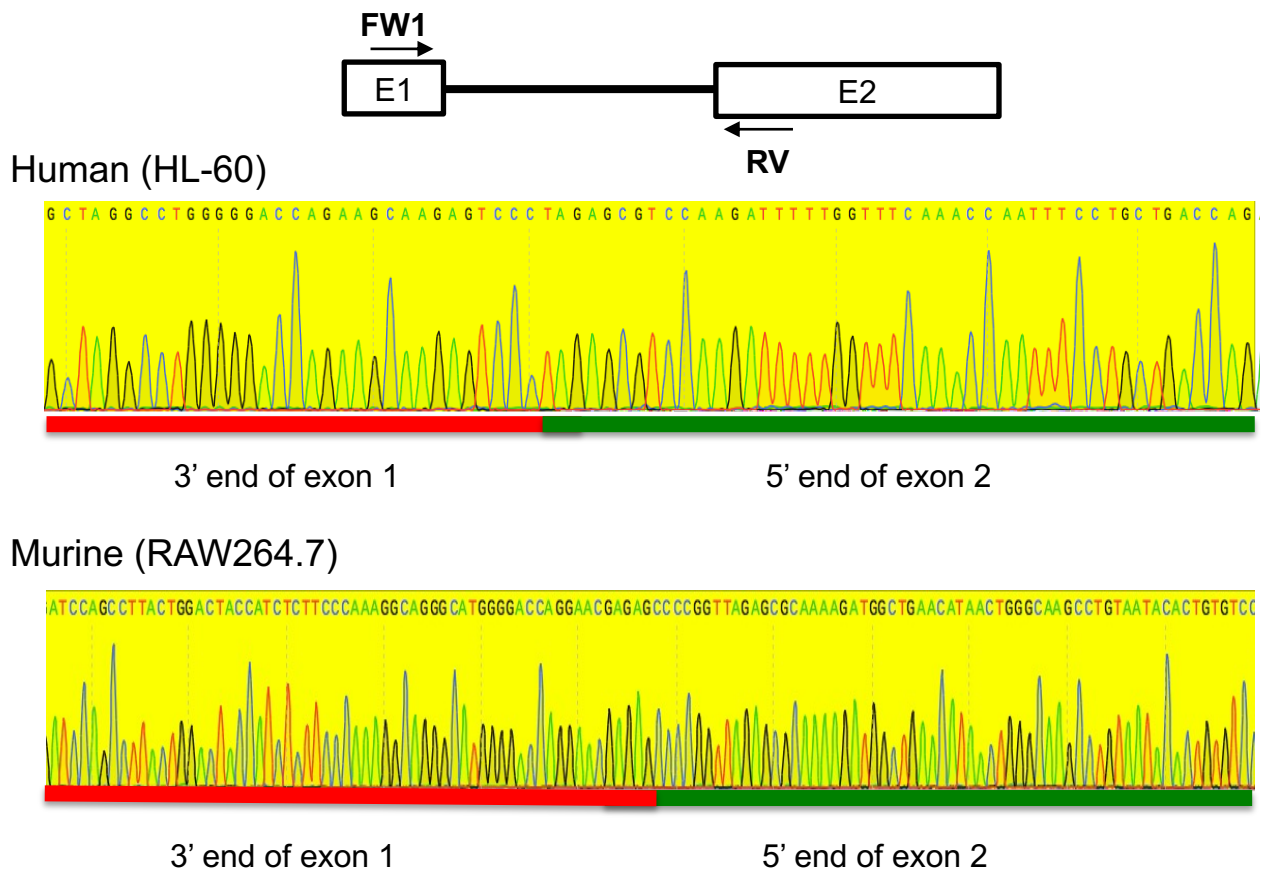**B**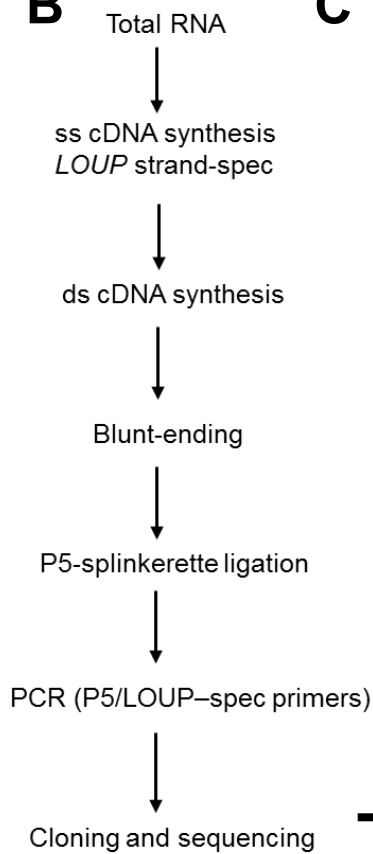**C****Identification of *LOUP* 5' end by P5-linker method**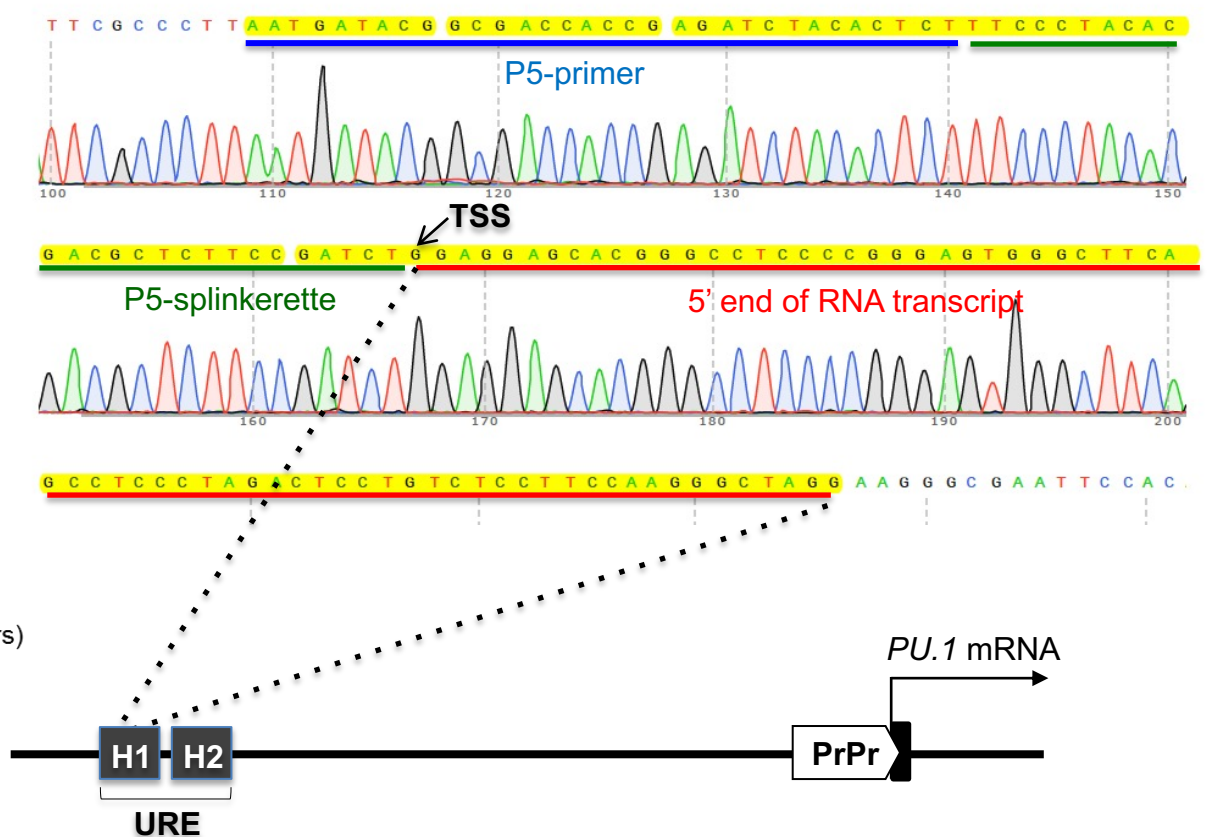**FigS2**

**D****Genomic location**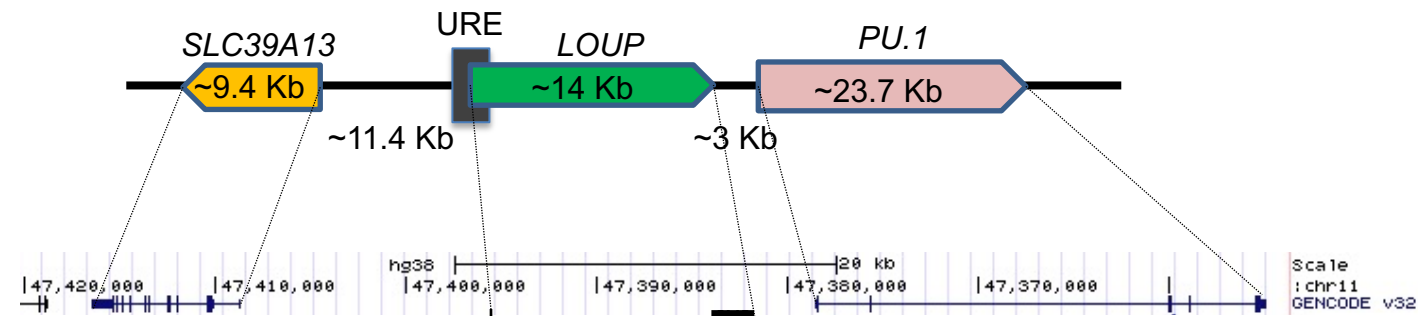**LOUP splicing pattern**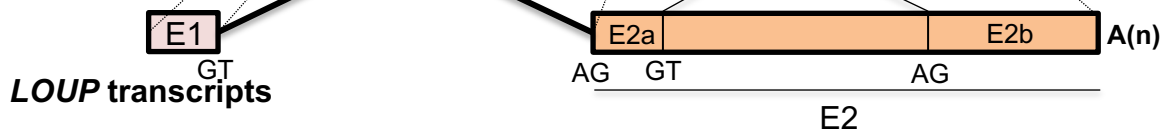

~2.3 Kb + A(n)

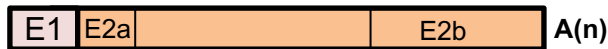

~1.0 Kb + A(n)

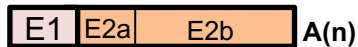**E****Coding potential analysis**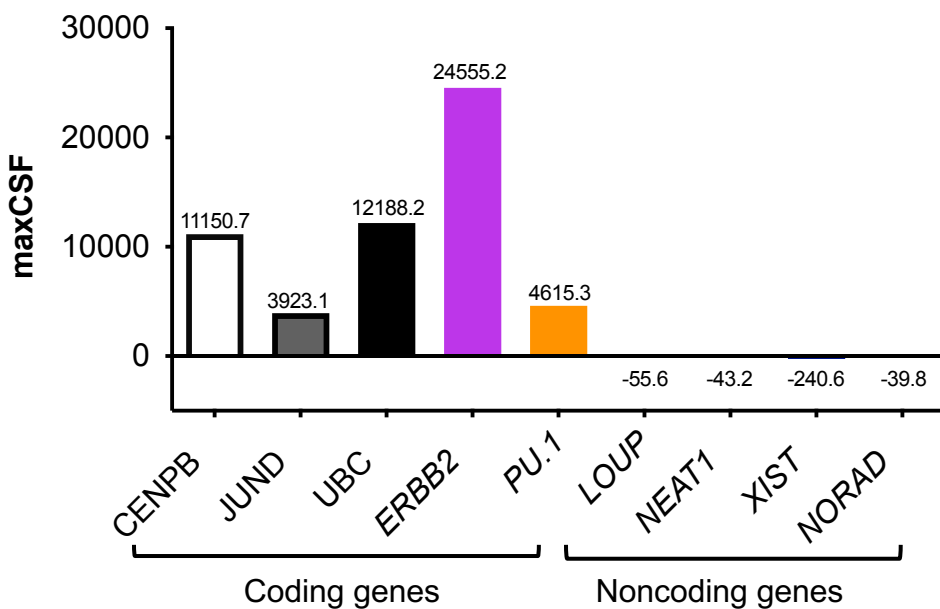**FigS2**

**F**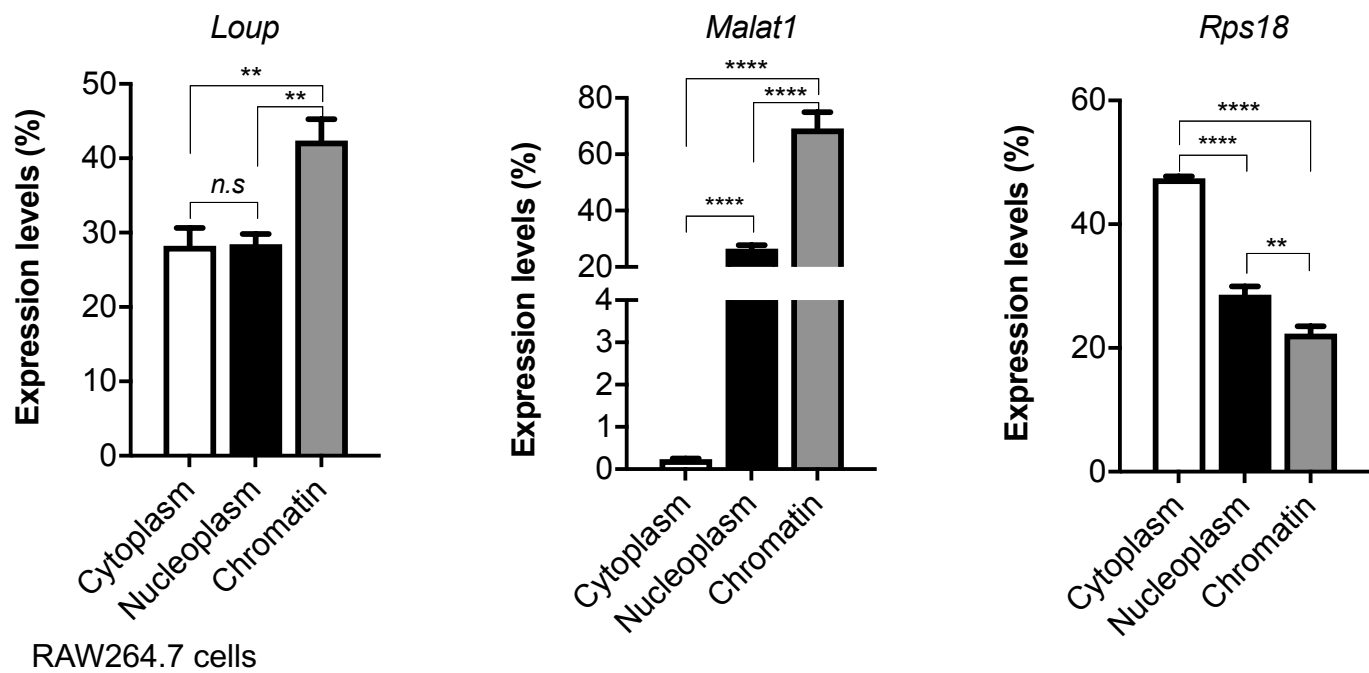**G**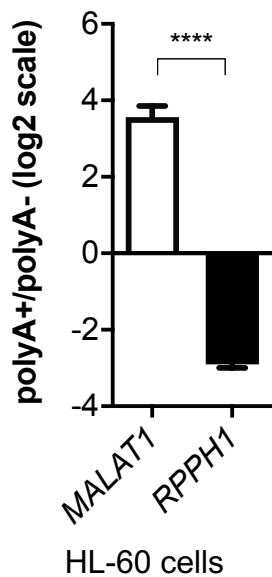**H**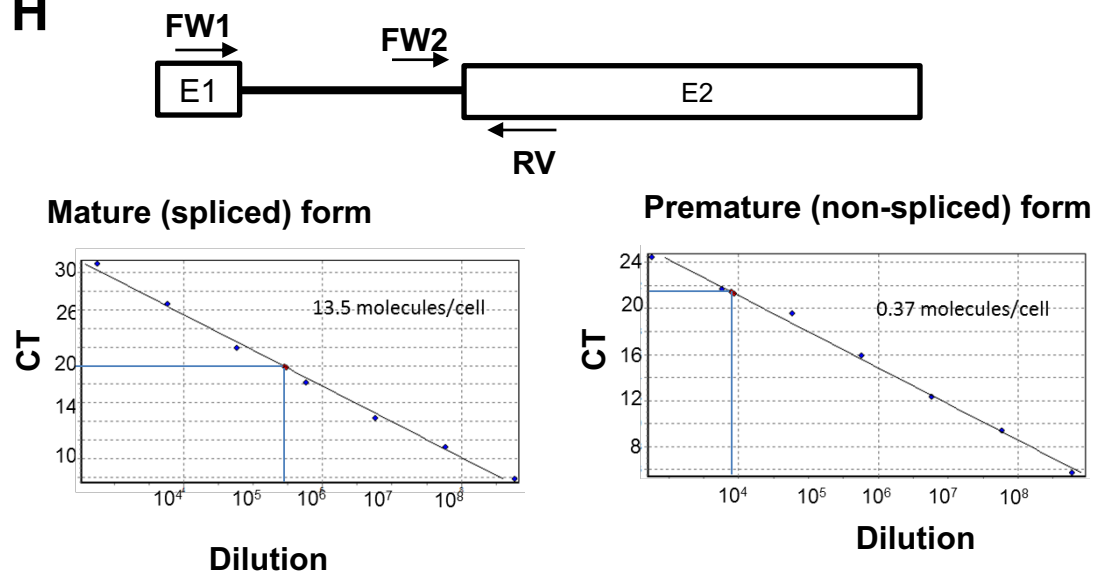**I**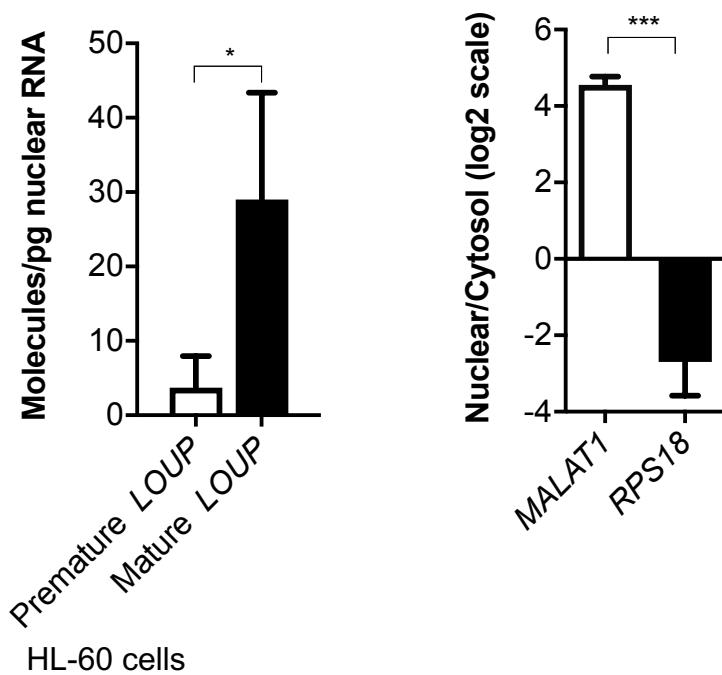

352 **Figure S2. Transcript map and molecular features of *LOUP*, Related to Figure 2**

- 353 (A) RT-PCR confirmation of exon-exon junction. Upper panel: Schematics of the PCR amplicon and  
354 primer locations. Lower panels: DNA sequencing of PCR products from human (HL-60) and murine  
355 (RAW264.7) cells.
- 356 (B) Workflow of 5' end mapping by the P5-linker ligation method.
- 357 (C) P5-linker ligation assay determining the 5' end of *LOUP* transcript. Upper panel: DNA sequencing  
358 analysis showing locations of the P5-primer, P5-splinkerette, and transcription start site (TSS). Lower  
359 panel: Schematic diagram of the *PU.1* locus. Shown are the URE element with the two homology  
360 regions H1 and H2.
- 361 (D) Schematic diagram showing the relative genomic location of *LOUP* and two neighbor genes: *PU.1*  
362 and *SLC39A13* as well as exact locations on the UCSC genome browser track (top), the splicing  
363 pattern of *LOUP* (middle), and resultant transcripts (bottom). E1: Exon 1, E2: Exon 2. E2a and E2b are  
364 exons derived from an additional splicing event within Exon 2. Exon boundaries were mapped by  
365 3'RACE and RT-PCR.
- 366 (E) PhyloCSF analysis of *LOUP* and other known coding and noncoding genes. Shown are coding  
367 potential scores.
- 368 (F) qRT-PCR analysis of *Loup* RNA in subcellular fractions isolated from RAW264.7 cells. Fraction  
369 enrichment controls include *Malat1* (chromatin) and *Rps18* (cytoplasm)<sup>51</sup>.
- 370 (G) qRT-PCR analysis of fraction enrichment controls including *MALAT1* (polyA<sup>+</sup>) and *RPPH1* (polyA<sup>-</sup>)  
371 (right panel).
- 372 (H) Measurement of transcript numbers per HL-60 cell. Upper panel: Schematic diagram of amplified  
373 amplicons showing primer locations for non-spliced *LOUP* (FW2-RV) and spliced *LOUP* (FW1-RV).  
374 Lower panels: qRT-PCR with RNA standard curve for spliced and non-spliced forms.
- 375 (I) Left panel: qRT-PCR analysis of *LOUP* forms in the nucleus. Right panel: Fraction enrichment  
376 controls include *MALAT1* (nucleoplasm) and *RPS18* (cytoplasm).
- 377 Error bars indicate SD (n=3). \* $p < 0.05$ ; \*\* $p < 0.01$ ; \*\*\* $p < 0.001$ , \*\*\*\* $p < 0.0001$ , *n.s.*: not significant.

**Bulk RNA-seq (Illumina Body Map)**

**A**

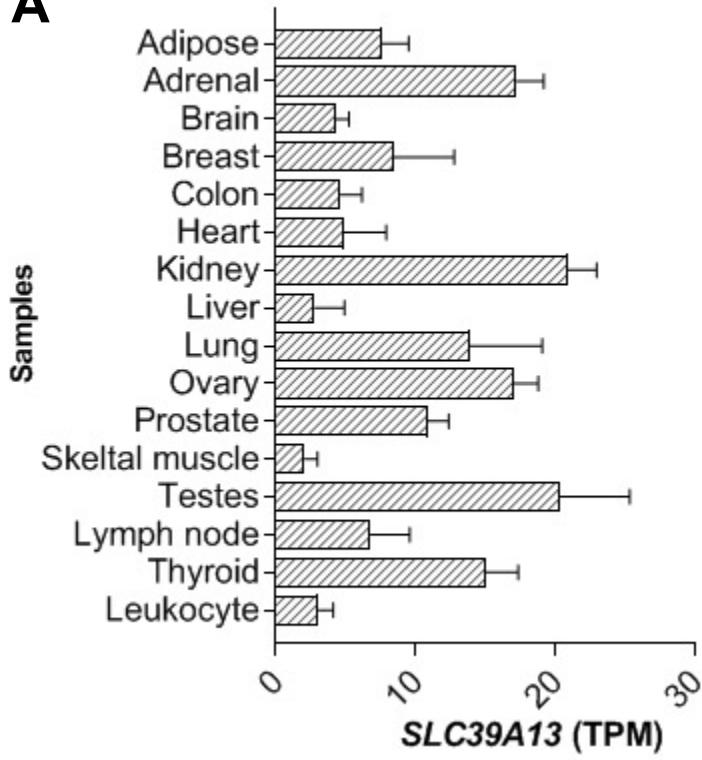

**B**

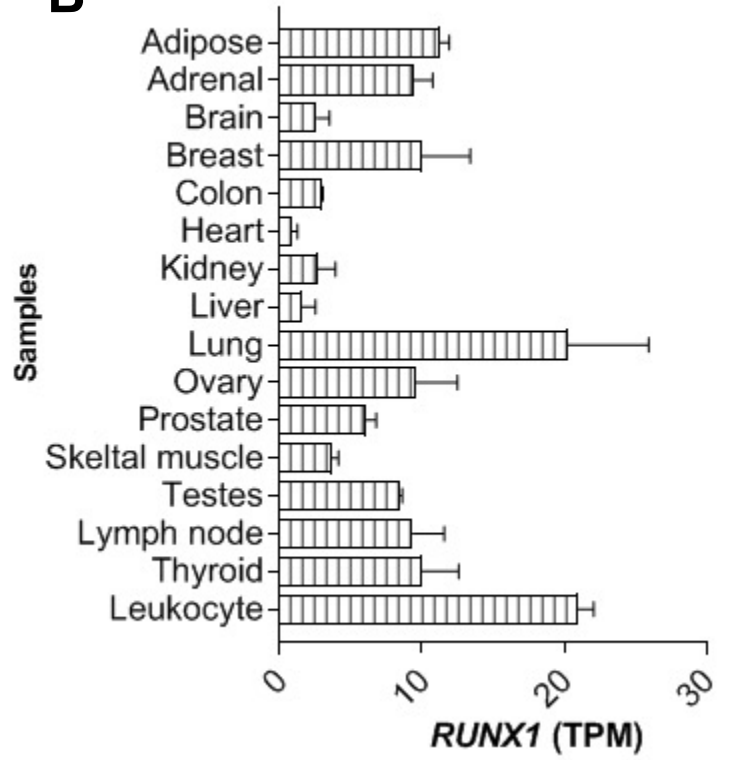

**C**

**SPRING plot of human PMNC and BMNC (scRNA-seq, 10x Genomics)**

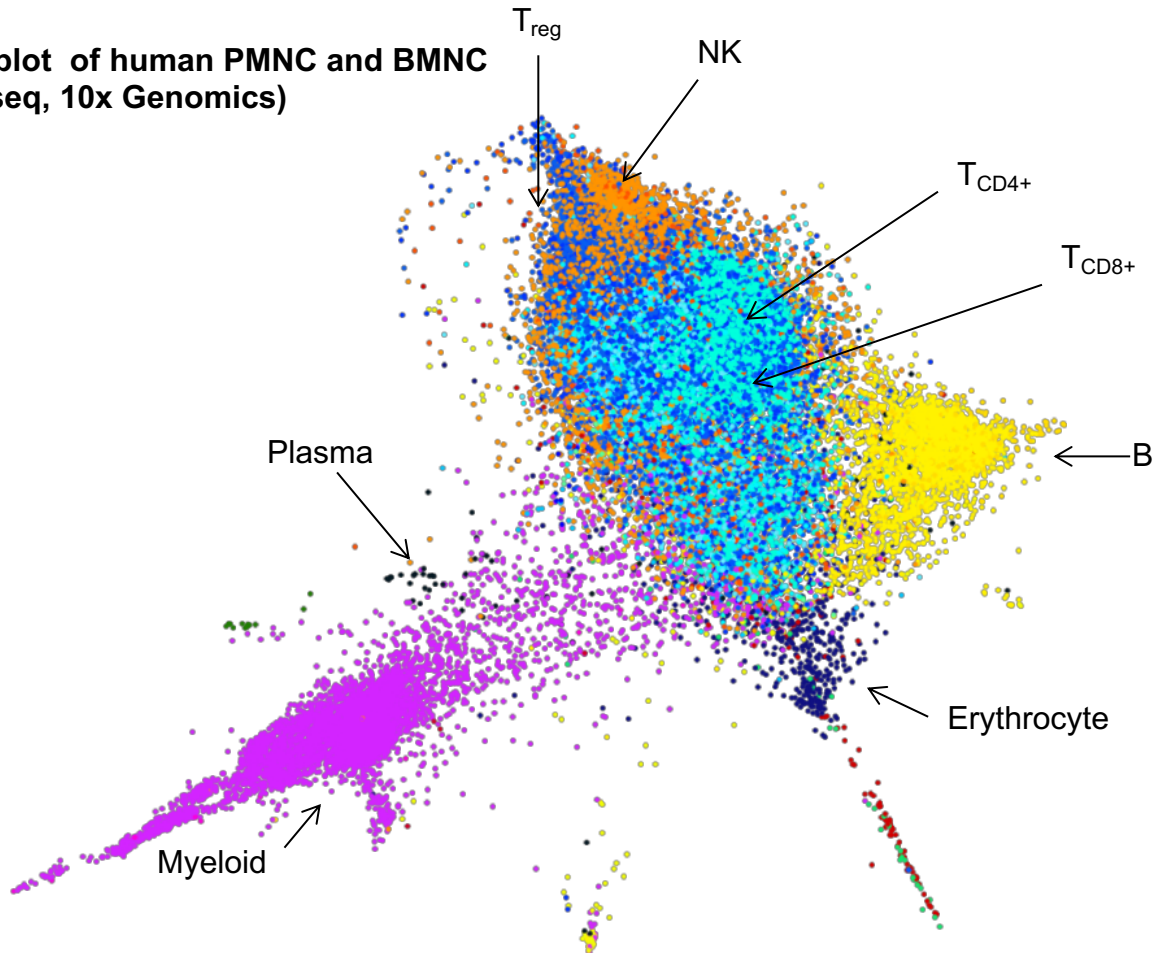

**FigS3**

# D scRNA-seq (10x Genomic)

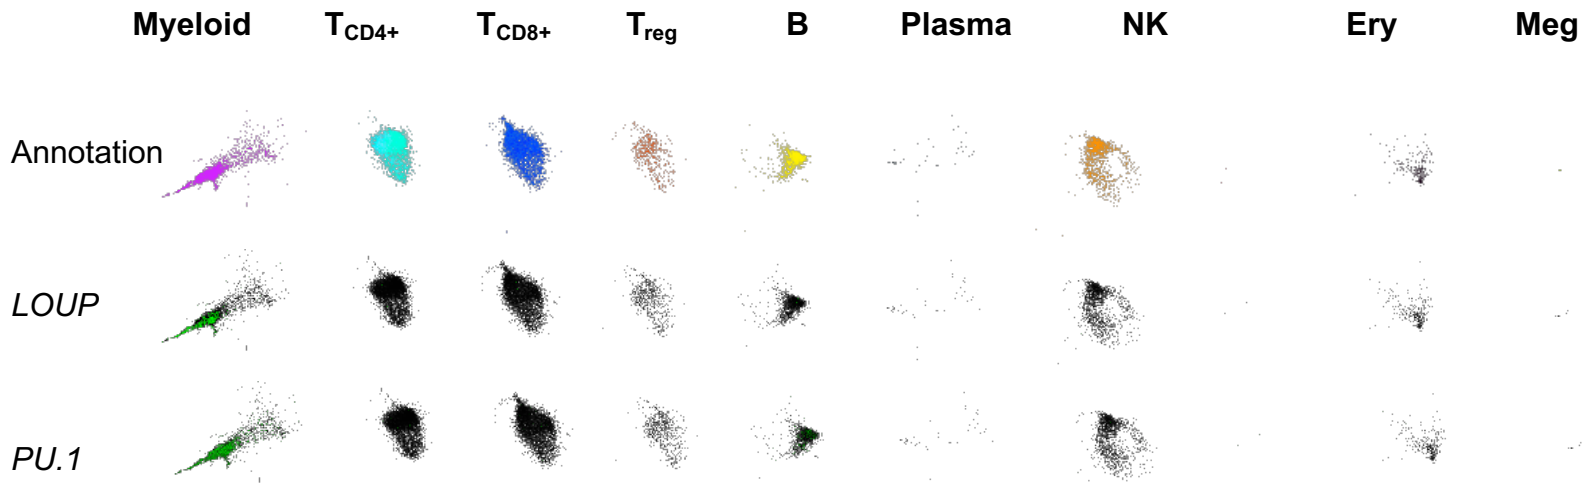

# E

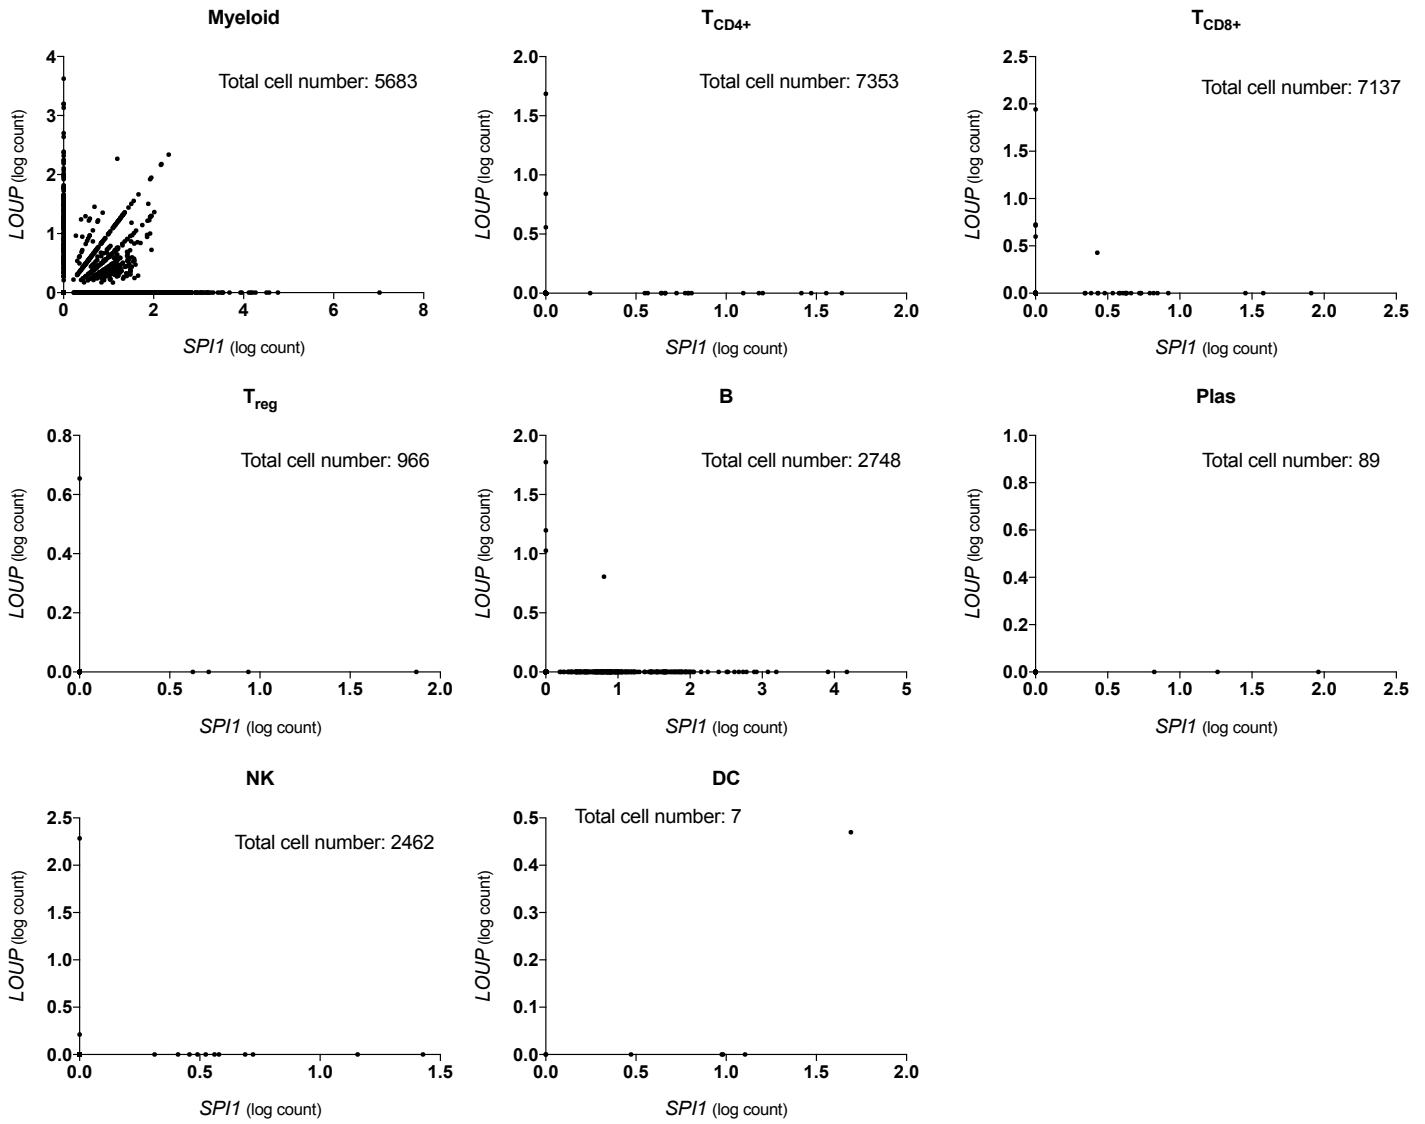

FigS3



scRNA-seq (10x Genomic)

**F**

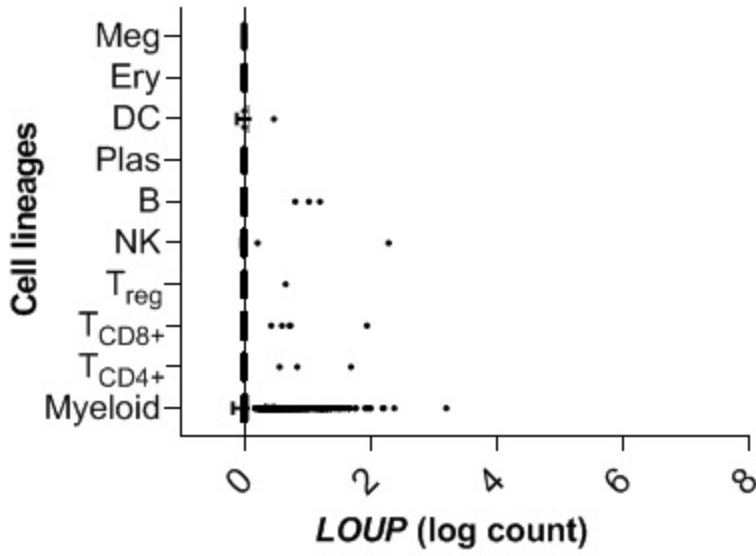

**G**

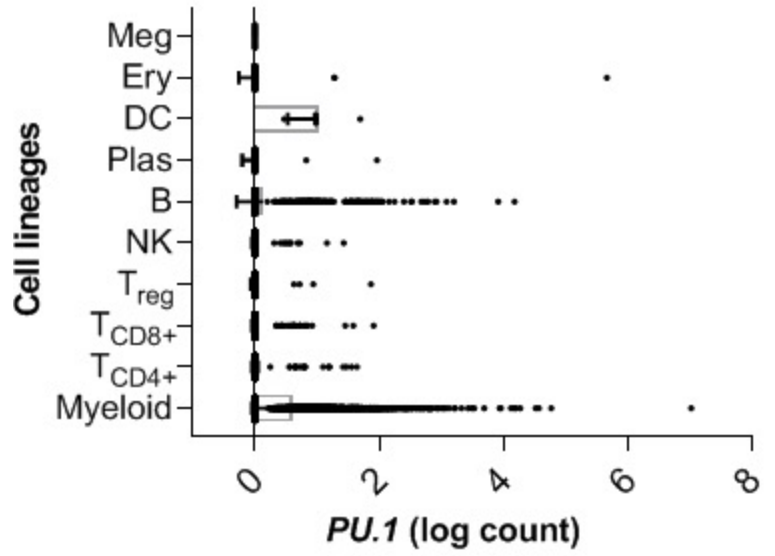

**H**

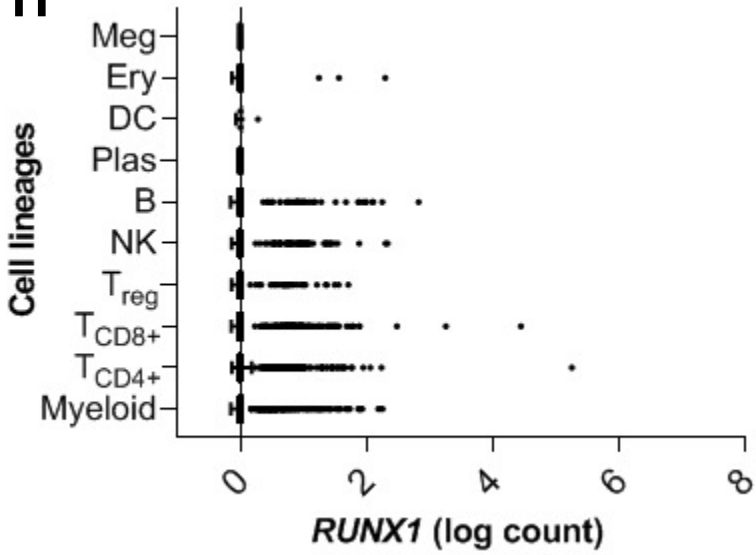

**I**

GO analysis of genes enriched in *LOUP*<sup>+</sup>/*PU.1*<sup>+</sup> cells (10x Genomic)

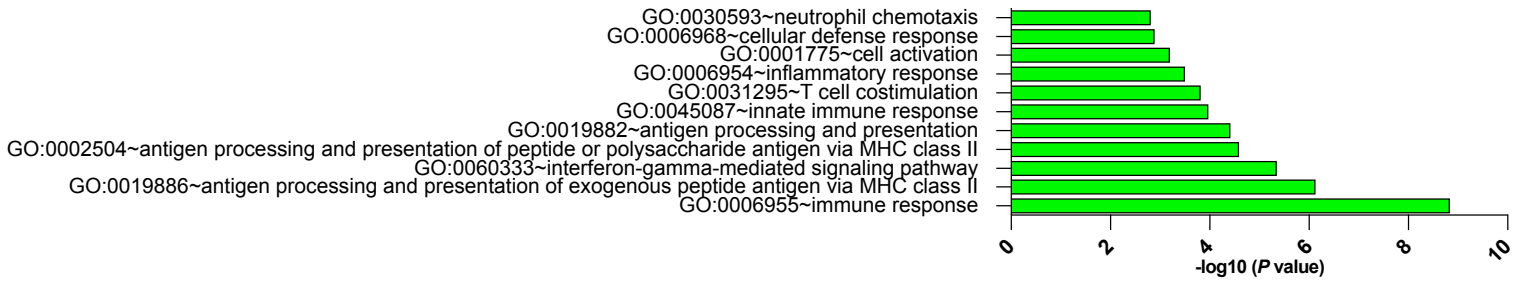

FigS3

378 **Figure S3. Gene expression profiles in normal tissues and cell lineages, Related to Figure 3**  
379 (A and B) Transcript profiles of *SLC39A13* and *RUNX1* in human tissues. Shown are transcript counts  
380 from the Illumina Body Map dataset. Error bars indicate SD (n=2).  
381 (C) SRING plot analysis of the 10x Genomic scRNA-seq dataset showing color-coded definitive blood  
382 lineages using the Blueprint-Encode annotation.<sup>48</sup> Annotated cells in sub-populations were grouped into  
383 major cell populations (see methods for details).  
384 (D) SRING plot analysis showing *LOUP* and *PU* RNA levels in each cell population. Upper panel:  
385 Color-coded cell populations extracted from the SPRING plot (C). Middle and bottom panels: locations  
386 of individual cells expressing *LOUP* and *PU.1*, respectively (green dots).  
387 (E) Scatter plots for each blood cell lineage of the 10x Genomic scRNA-seq dataset showing the level  
388 of expression of *PU.1* mRNA versus the level of expression of *LOUP*. Each dot on the graph represents  
389 an individual cell.  
390 (F, G, and H) Transcript profiles of *LOUP* RNA, and *PU.1* and *RUNX1* mRNAs in blood cell lineages of  
391 the 10x Genomic scRNA-seq dataset. Each dot on the graph represents an individual cell.  
392 (I) GO analysis for enrichment of biological processes using a list of genes upregulated in *LOUP*<sup>+</sup>/*PU.1*<sup>+</sup>  
393 cells as compared to *LOUP*<sup>-</sup>/*PU.1*<sup>-</sup> cells. Top enrichment GO terms are shown.

**A**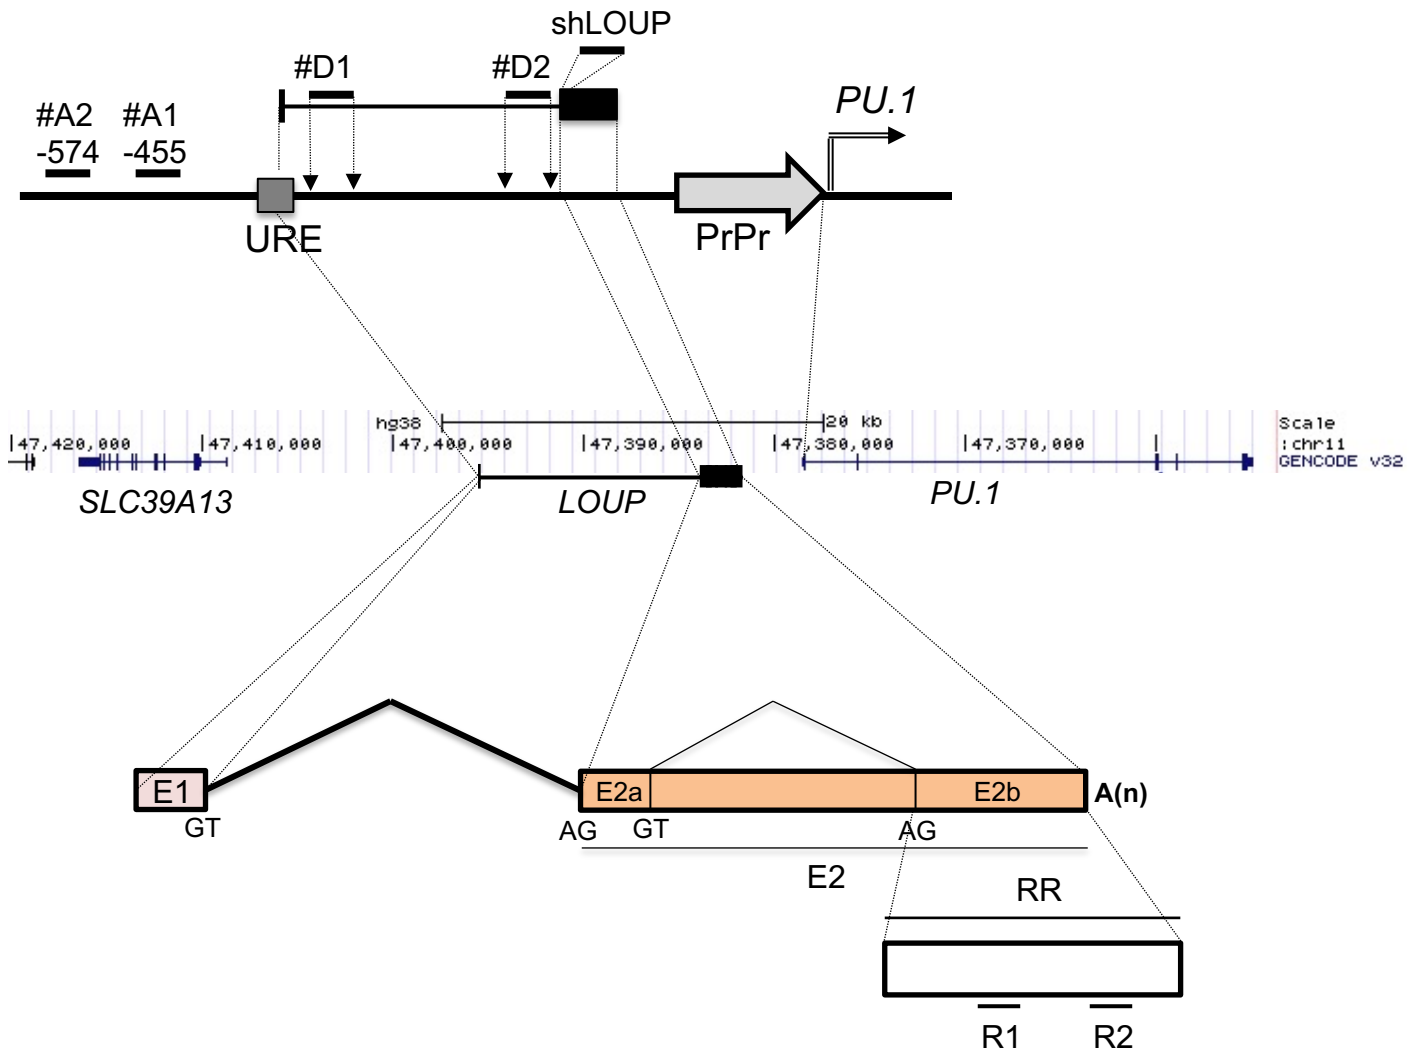**B**

### Schematic strategy for *LOUP* depletion by CRISPR/Cas9

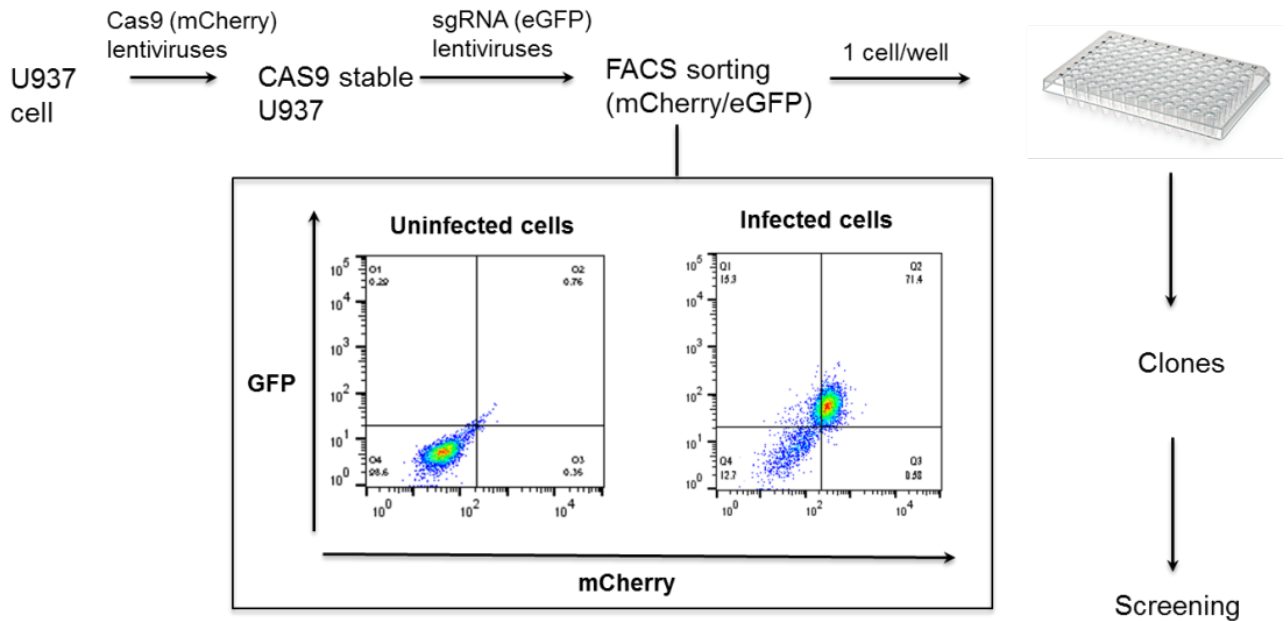**FigS4**

# Indel composition and frequency analyses by ICE

**C**

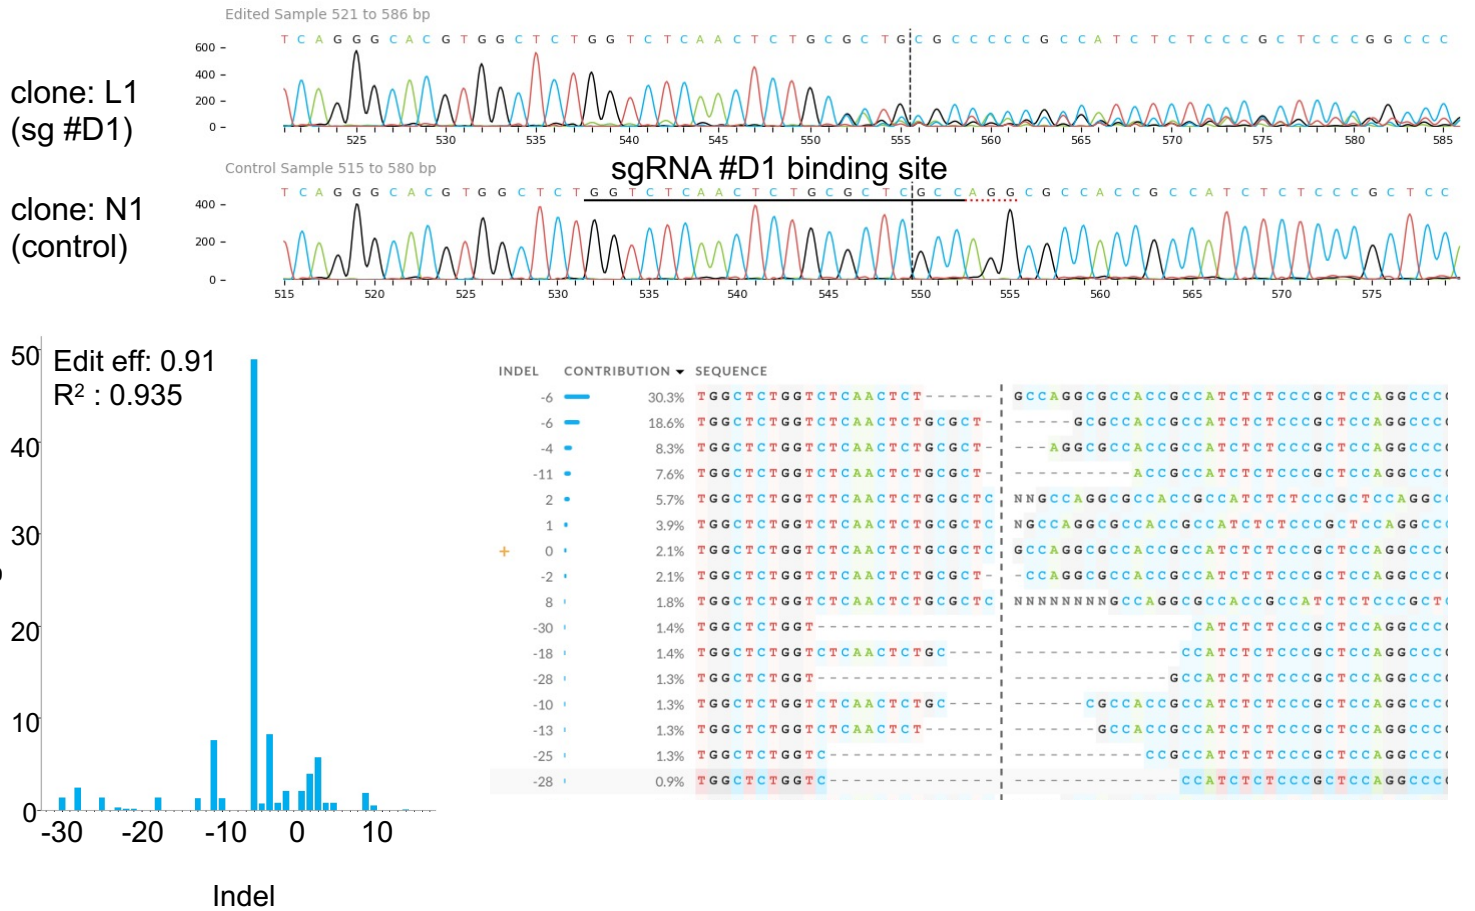

**D**

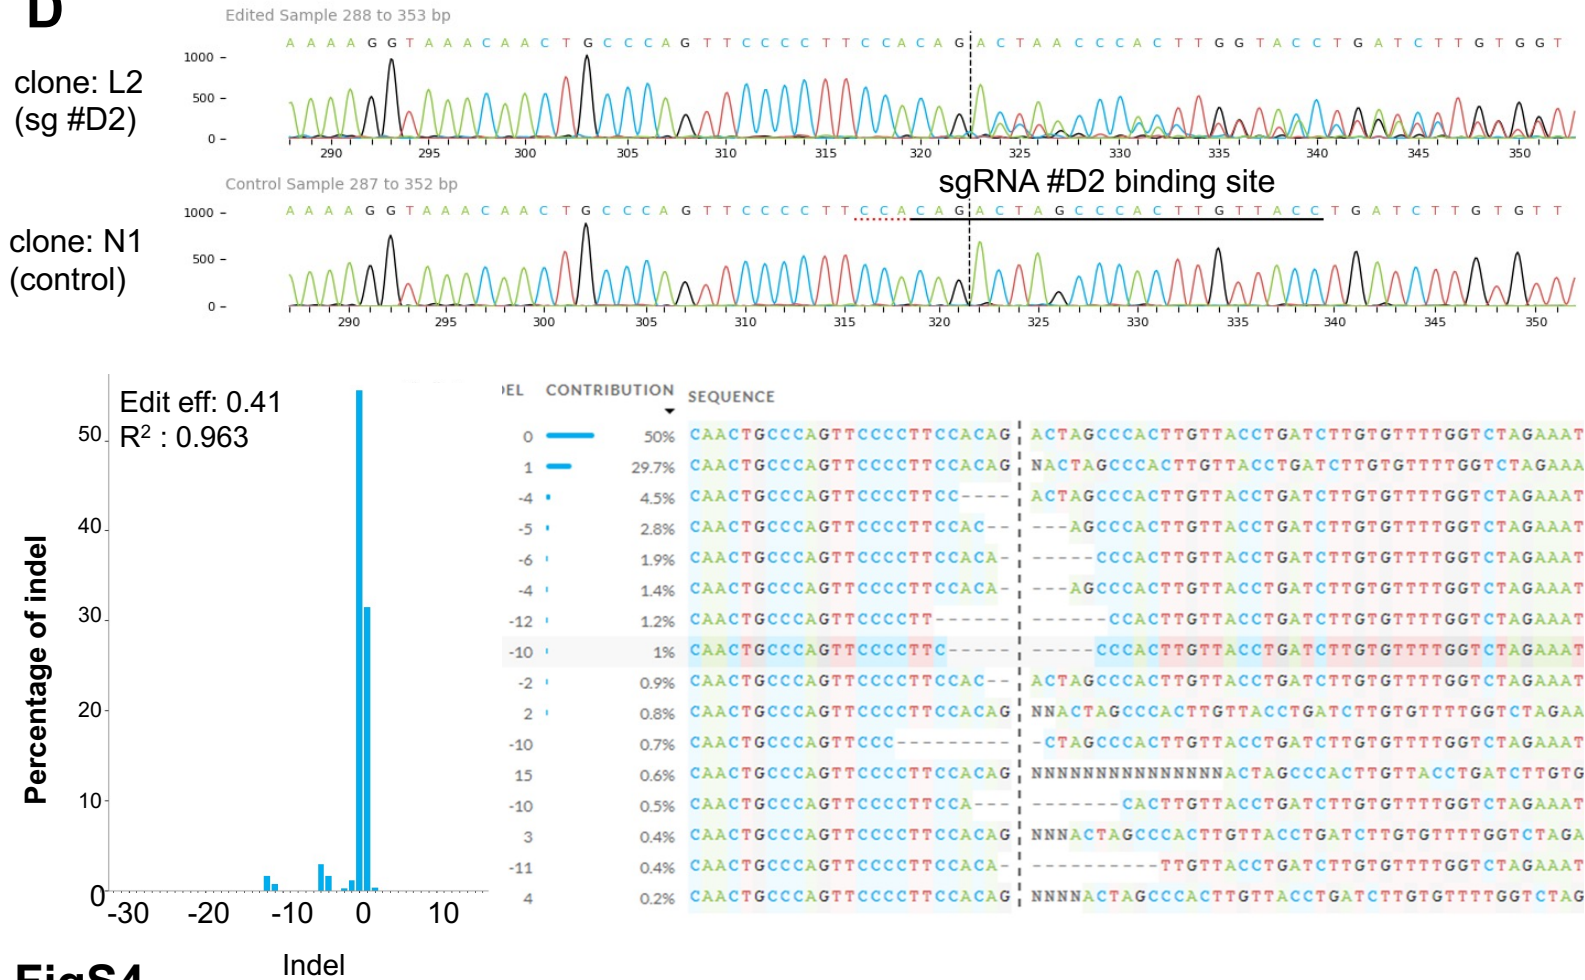

**FigS4**

**E****Genomic DNA sequence at sg #D2 targeting region**

clone N1 (control) CTAGACCAAAACACAAGATCAGGTAACAAGTGGGCTAGTCTGTTGAAGGGGAACTGGGCAGTTGTTTACCTTT

Homologous indels clone L2a (sg #D2) CTAGACCAAAACACAAGATCA-----GGGAACTGGGCAGTTGTTTACCTTT

clone L2b (sg #D2) CTAGACCAAAACACAAGATCAGGTAACAAGTGGGCTAGT---GGAAGGGGAACTGGGCAGTTGTTTACCTTT

Green: upstream plus gRNA binding site

Red: downstream of gRNA binding site

**F Transient expression, K562 cells**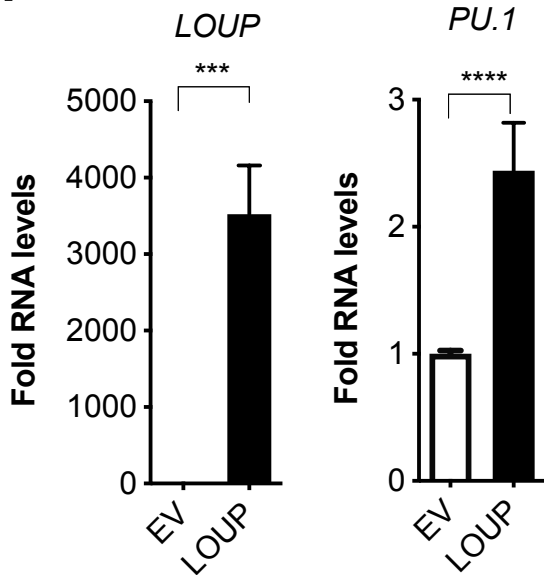**G Stable overexpression, Kasumi-1 cells**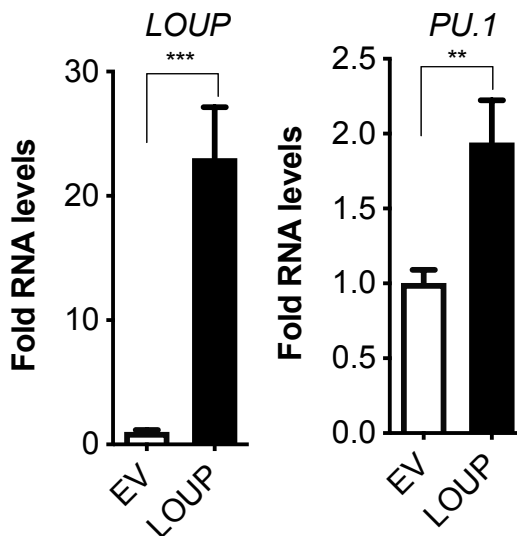**CRISPR/Cas9, U937 cells****H**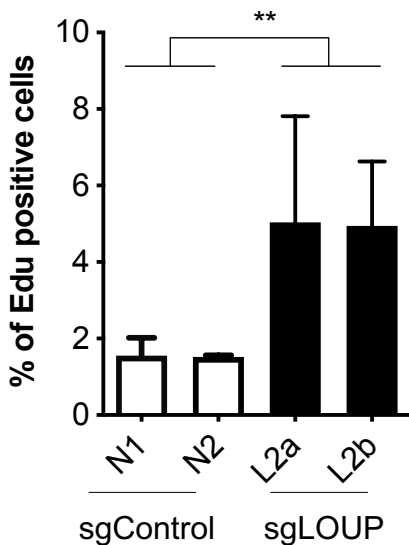**I**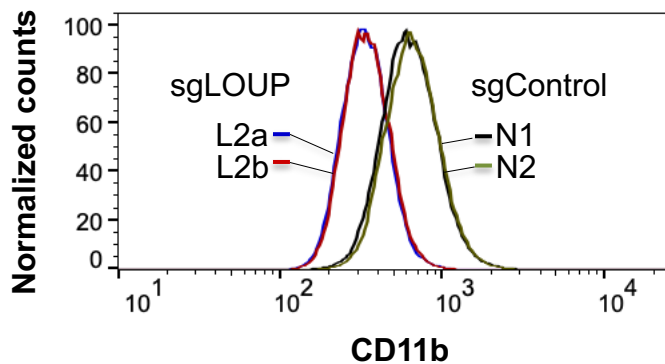**J**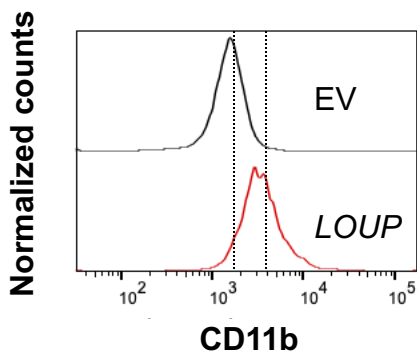**K**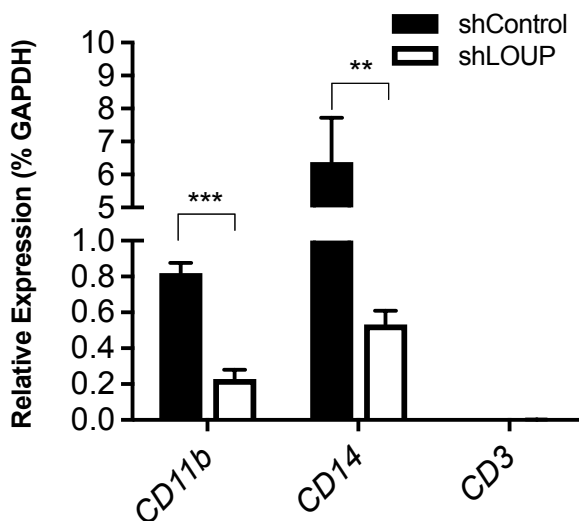**FigS4**

394 **Figure S4. Effects of gain and loss of *LOUP* expression, Related to Figure 4**

395 (A) Schematic diagram showing the genomic location and transcript pattern of *LOUP*. Top diagram:  
396 Location of *LOUP* gene relative to the URE and the PrPr. Shown are sgRNA-binding sites for *LOUP*  
397 depletion using CRISPR/Cas9 technology (#D1 and #D2) and for *LOUP* induction by CRISPR/dCas9-  
398 VP64 technology (#A1 and #A2), as well as shRNA binding site for *LOUP* knock-down. Distance from  
399 the TSS of *LOUP* is indicated in bp. Middle diagram: Genomic locations of *LOUP* and its neighboring  
400 genes, *SLC39A13* and *PU.1*, on the USCS genome browser track. Bottom diagram: The splicing  
401 pattern of *LOUP*. E1: Exon 1, E2: Exon 2. E2a and E2b are exons derived from an additional splicing  
402 event within Exon 2 (see also Figure S2D). White boxed area depicts a repetitive region (RR) of 670  
403 bp. The schematic diagram underneath illustrates mature *LOUP* lncRNA containing the RR region. R1  
404 and R2: two regions with high catRAPID *in silico* prediction interaction scores (see also Figure 6E).

405 (B) Schematic of strategy for *LOUP* depletion. Included is a FACS sorting scheme for isolation of cells  
406 expressing both mCherry (Cas9) and eGFP (sgRNAs).

407 (C and D) Inference of CRISPR edits (ICE) analyses for indel composition and frequency of  
408 CRISPR/Cas9 cell clones. Top panels: Trace file segments of amplified genomic regions surrounding  
409 sgRNA-binding sites (#D1 and #D2 *LOUP* sgRNAs) in the edited (upper panel) and the control (lower  
410 panel) samples. Dotted red underline: Protospacer adjacent motif (PAM) sequence. Solid black  
411 underline: guide sequences. Expected cut sites are denoted as vertical dotted lines. Bottom-left panel:  
412 Indel efficiency analysis. Bottom-right panel: Indel distribution analysis. Dashed lines indicate deletion  
413 length.

414 (E) Genomic PCR and Sanger sequencing confirmation of U937 cell clones with *LOUP* homozygous  
415 indels (L2a and L2b) and control (N1).

416 (F and G) qRT-PCR expression analysis for *LOUP* (left panels) and *PU.1* (right panels). F) K562 cells  
417 transiently transfected with *LOUP* cDNA or empty vector (EV) by electroporation. G) Kasumi-1 cells  
418 stably transfected with *LOUP* cDNA or empty vector (EV) by lentiviral transduction.

419 (H) Edu incorporation was measured by flow cytometry for cell proliferation. U937 sgRNA cell clones  
420 with *LOUP* indels (L2a and L2b) and controls (N1 and N2).

421 (I and J) Representative flow cytometry results of CD11b myeloid marker expression. I) U937 sgRNA  
422 cell clones with *LOUP* indels (L2a and L2b) and controls (N1 and N2). J) Kasumi-1 cells stably  
423 transfected with *LOUP* cDNA or empty vector (EV) by lentiviral transduction.

424 (K) qRT-PCR expression analysis for myeloid marker *CD11b*, macrophage marker *CD14*, and T-cell  
425 marker *CD3* after knocking down *LOUP* in cord blood CD34<sup>+</sup> HSPC cells following myeloid induction  
426 with cytokines.

427 Error bars indicated SD (n=3), \*\* $p < 0.01$ ; \*\*\* $p < 0.001$ ; \*\*\*\* $p < 0.0001$ .

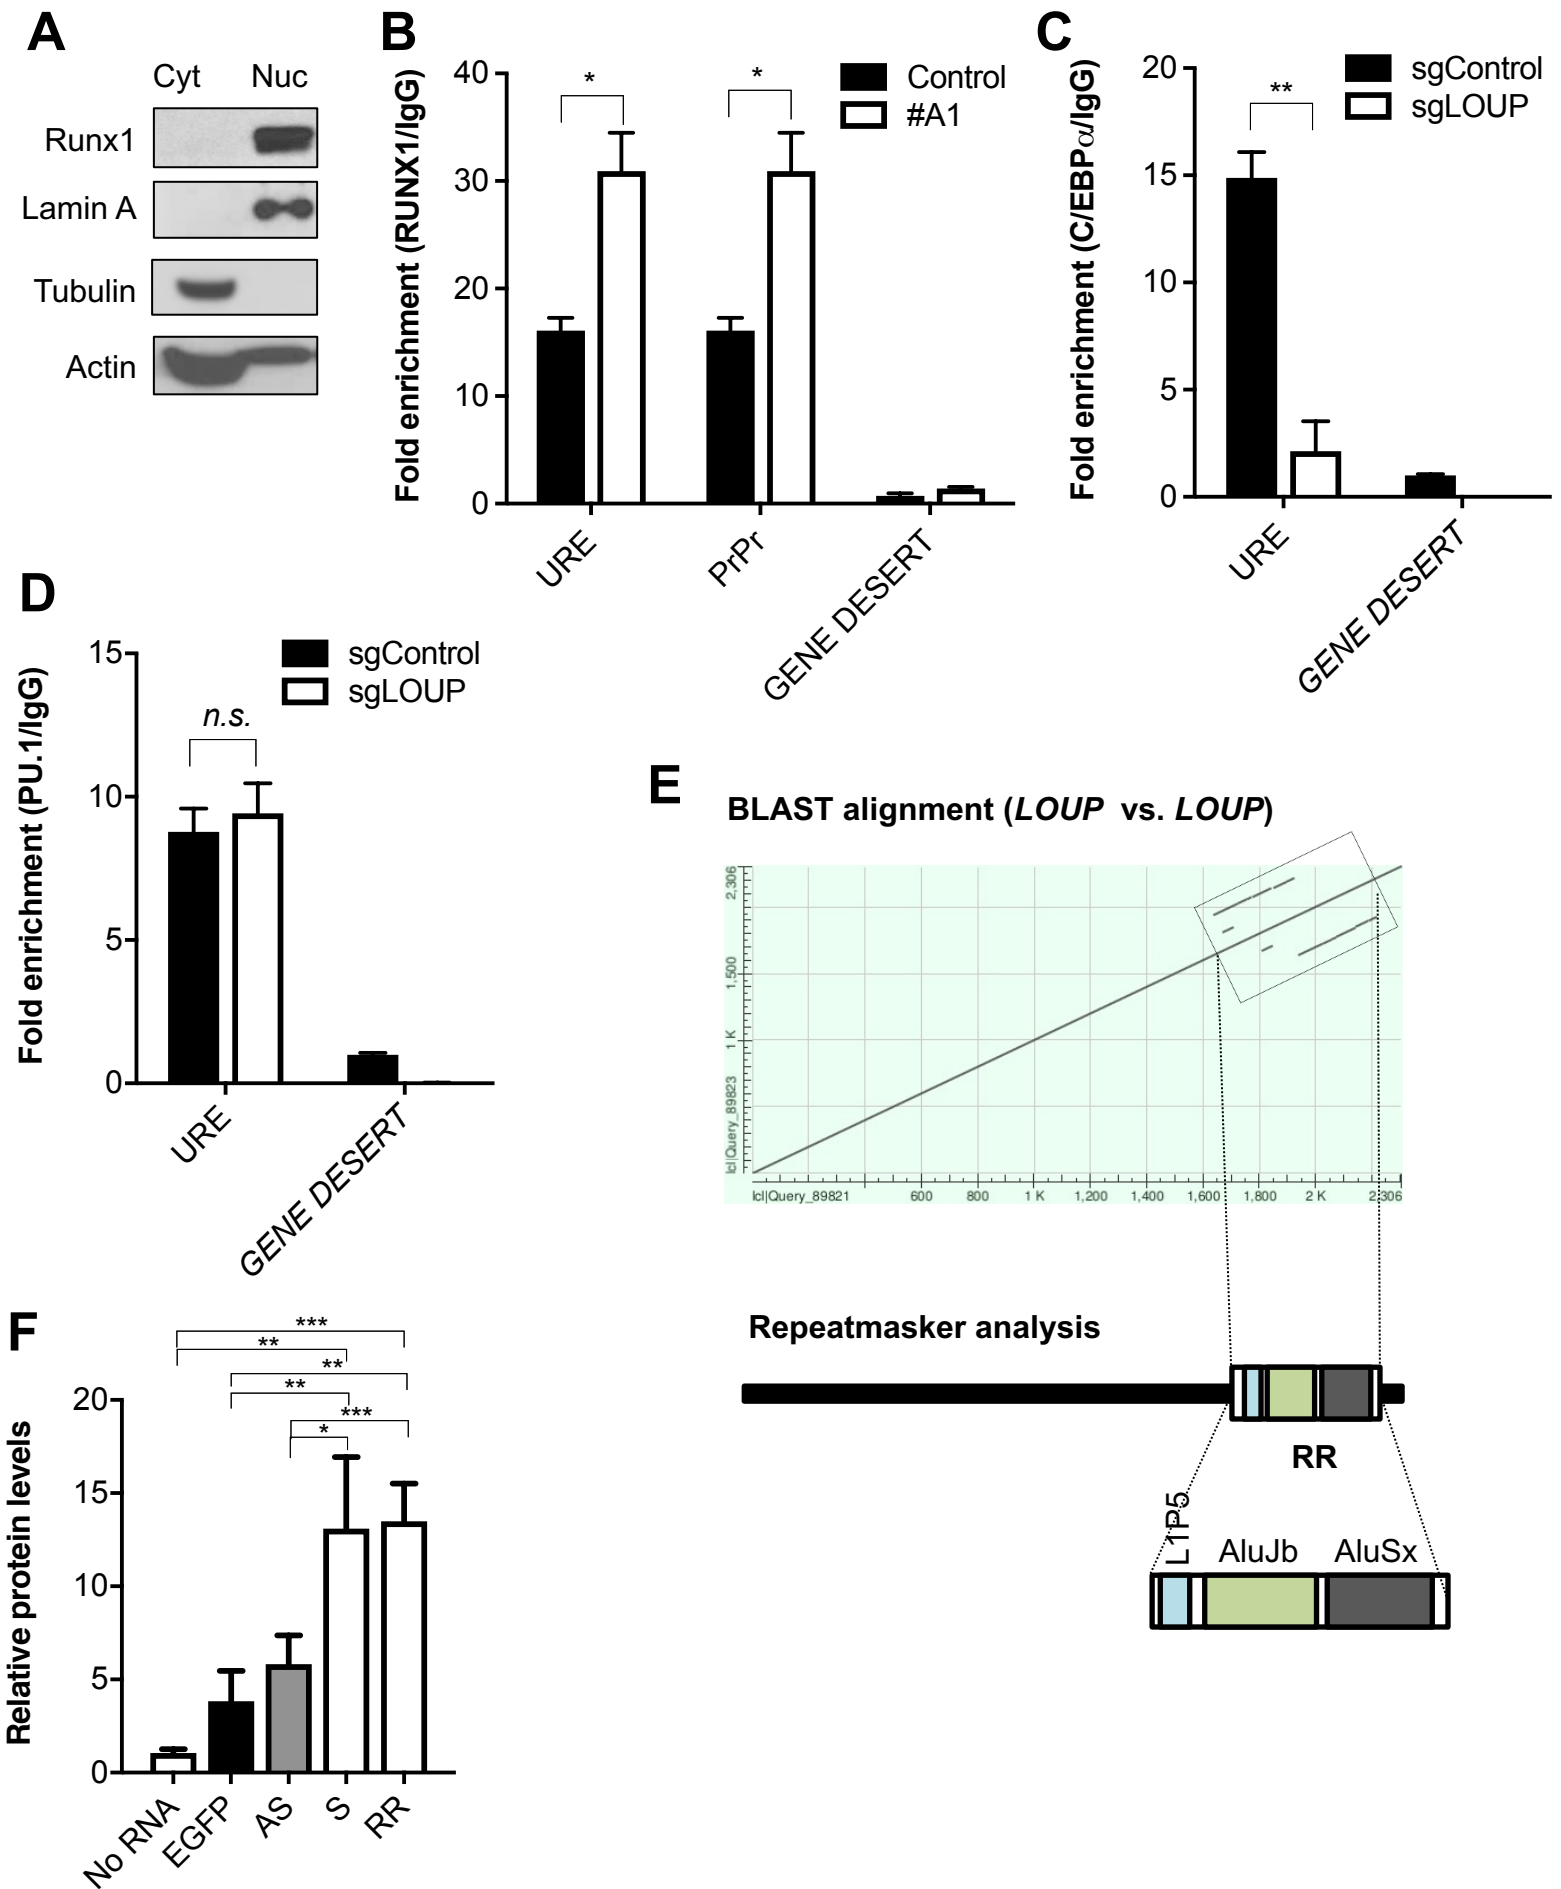

**FigS5**



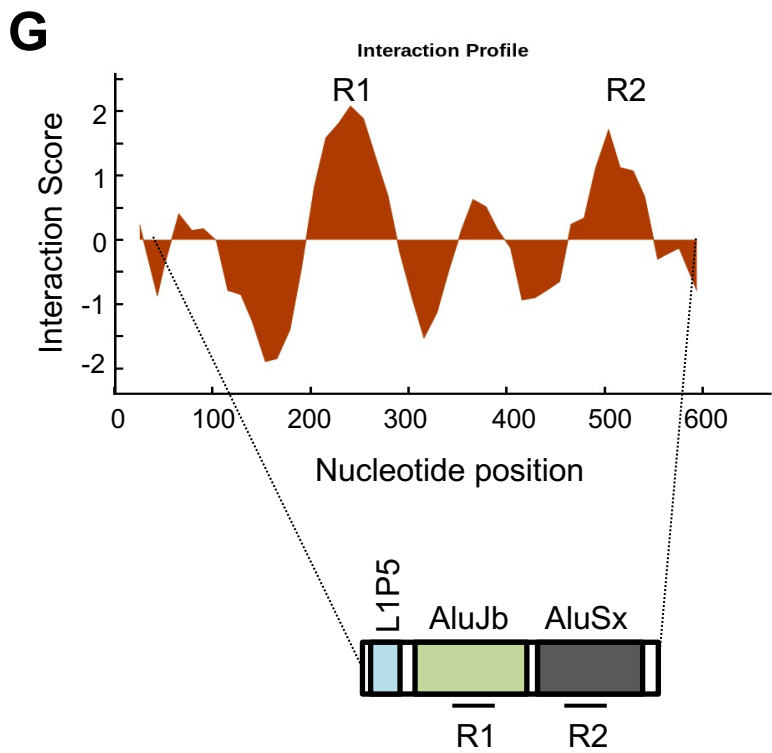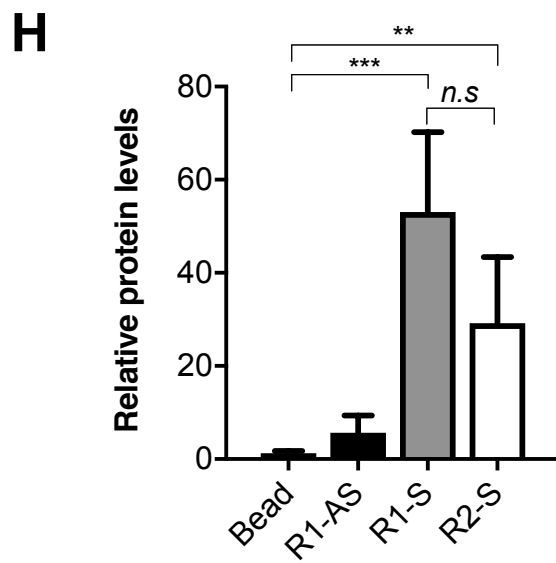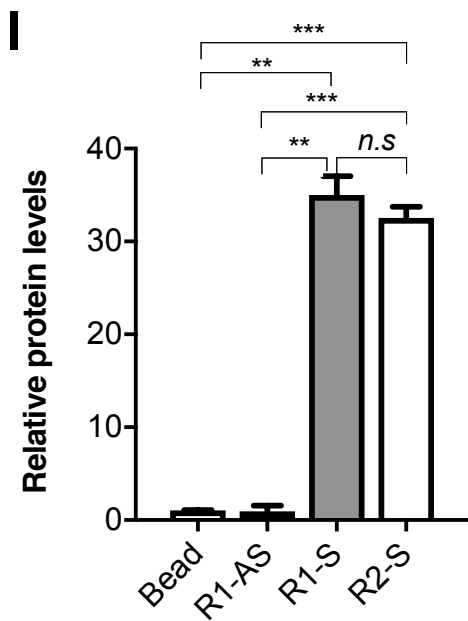

**FigS5**

428 **Figure S5. *LOUP* interacts with RUNX1, Related to Figure 6**

429 (A) Immunoblot of RUNX1 and control proteins in nuclear and cytosol fractions from U937 cells.

430 (B) ChIP-qPCR analysis of RUNX1 occupancy at the URE and the PrPr. K562 dCas9-VP64-stable cells  
431 infected with *LOUP*-targeting (#A1) or non-targeting (control) sgRNAs. PCR amplicons include the URE  
432 (contains known RUNX1-binding motif at the URE), PrPr (contains putative RUNX1-binding motif in the  
433 PrPr) and GENE DESERT (a genome region that is devoid of protein-coding genes).

434 (C and D) ChIP-qPCR analysis for occupancy of C/EBP $\alpha$  and PU.1 at the URE. *LOUP*-depleted U937  
435 (sgLOUP, L2a) and control (sgControl, N1) clones were used. PCR amplicons include the URE  
436 (contains known RUNX1-binding motif at the URE) and GENE DESERT (a genome region that is  
437 devoid of protein-coding genes).

438 (E) Nucleotide identity plot generated from alignment of *LOUP* to itself using discontinuous megablast  
439 algorithm from BLAST (<http://blast.ncbi.nlm.nih.gov/>). Boxed area depicts a repetitive region (RR) of  
440 670 bp. The schematic diagram underneath illustrates mature *LOUP* lncRNA containing the RR region

441 (F) Quantitation of RUNX1-*LOUP* interaction. Intensities of immunoblot bands from RNA pull-down  
442 analysis (Bead: no RNA control; EGFP: *EGFP* mRNA control; AS: full-length antisense control; S: full-  
443 length sense, and RR: repetitive region) were analyzed by ImageJ software. Data are shown relative to  
444 Bead (no RNA control samples). Error bars indicated SD (n=3).

445 (G) *In silico* prediction of RR-RUNX1 interaction by catRAPID Fragments algorithm. R1 and R2: two  
446 regions with high interaction scores.

447 (H and I) Quantitation for RNAP binding analysis of R1 and R2 with recombinant full-length and Runt  
448 domain of RUNX1. Intensities of immunoblot bands from RNA pull-down analysis (Bead: no RNA  
449 control; R1-AS (R1 antisense control); R1-S (R1 sense); and R2-S (R2 sense)) were analyzed by  
450 ImageJ software. Data are shown relative to Bead (no RNA control samples).

451 Error bars indicated SD (n=3), \* $p < 0.05$ ; \*\* $p < 0.01$ ; \*\*\* $p < 0.001$ , *n.s.*: not significant.

452

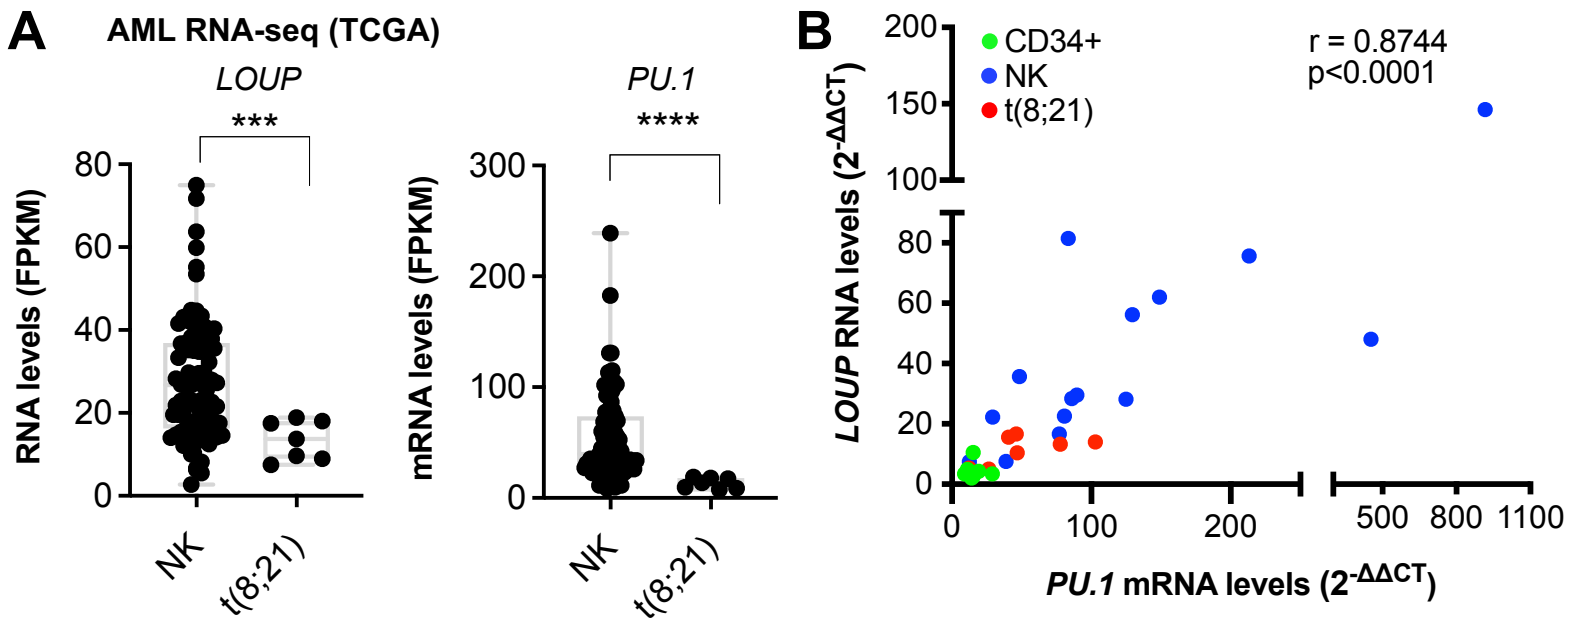

qRT-PCR, RUNX1-ETO inducible cells

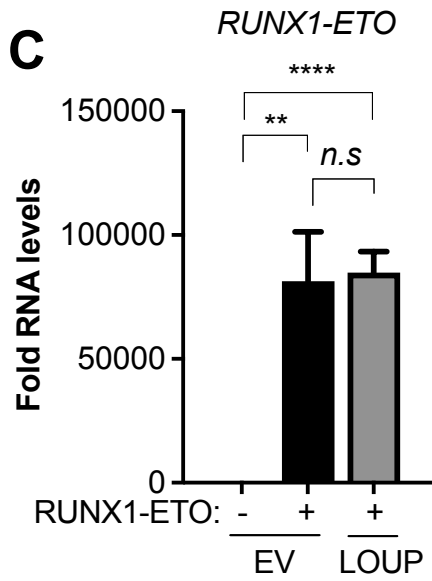

Knockdown of RUNX1-ETO in Kasumi-1 cells

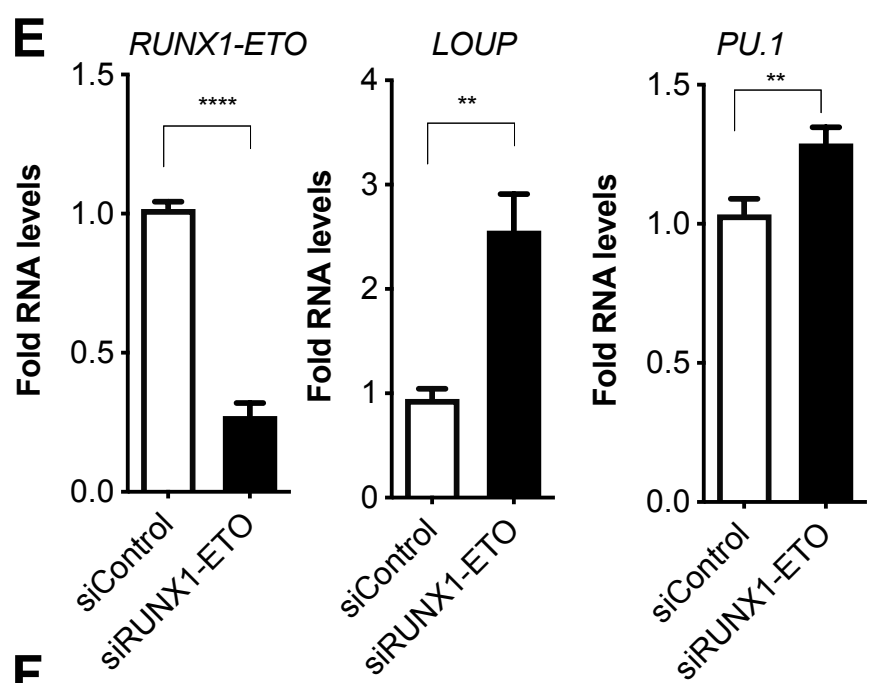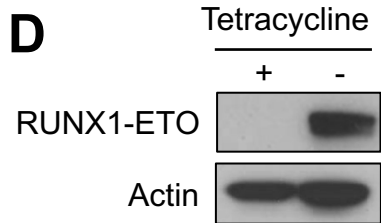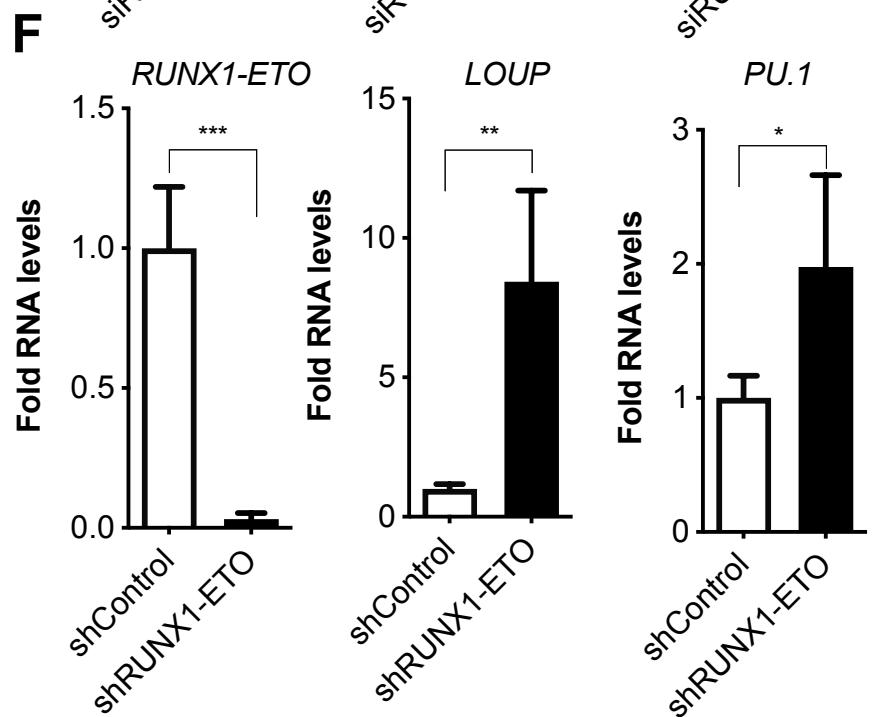

FigS6

**G**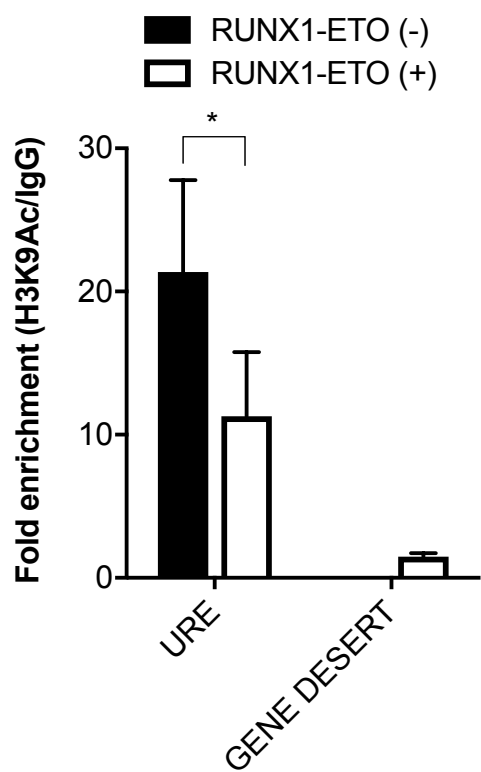**H**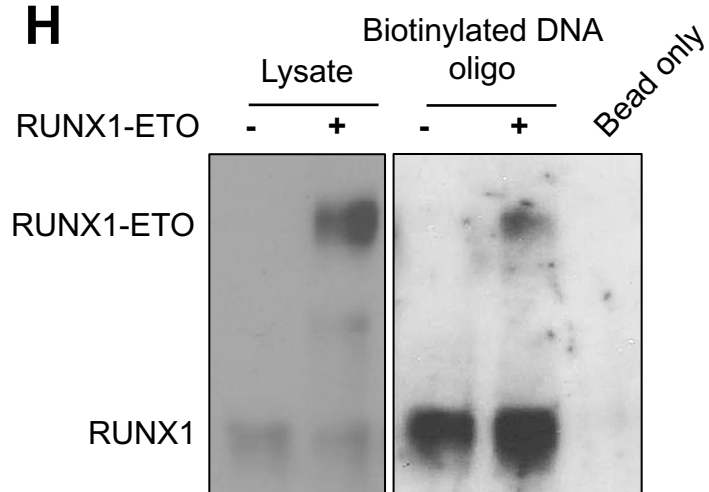**FigS6**

453 **Figure S6. RUNX1-ETO inhibits *LOUP* expression, Related to Figure 7**

454 (A) Transcript count for *LOUP* levels in AML patient samples (RNA-seq data was retrieved from TCGA  
455 portal. NK: normal karyotype (n=87), t(8;21): t(8;21) karyotype (n=7); Mann-Whitney U test: \*\*\* $p <$   
456 0.001, \*\*\*\* $p <$  0.0001.

457 (B) Scatter plot showing the correlation between *LOUP* and *PU.1* RNA levels measured by qRT-PCR.  
458 Each dot represents a human sample. CD34<sup>+</sup>: healthy subjects (green dots, n=7), NK: AML patients  
459 with normal karyotype (blue dots, n=14), t(8;21): AML patients with t(8;21) karyotype (red dots, n=7).  
460 Spearman's rank correlation coefficient (r) was computed.

461 (C) qRT-PCR expression analysis of *RUNX1-ETO* mRNA in tetracycline-inducible RUNX1-ETO-  
462 expressing (Tet-Off) U937 cells (*RUNX1-ETO* +/-: with/without induction). Cells were transfected with  
463 empty vector (EV) and *LOUP* cDNA. Error bars indicate SD (n=3), \*\* $p <$  0.01; \*\*\*\* $p <$  0.0001; *n.s.*: not  
464 significant.

465 (D) Immunoblot of RUNX1-ETO and actin control in tetracycline-inducible RUNX1-ETO-expressing  
466 (Tet-Off) U937 cells 48 h following tetracycline withdrawal.

467 (E and F) qRT-PCR expression analysis of *RUNX1-ETO* (left panel), *LOUP* RNA (middle panel) and  
468 *PU.1* mRNA (right panel). E) Kasumi-1 cells transfected with mismatch siRNA (siControl) and RUNX1-  
469 ETO targeting siRNA (siRUNX1-ETO). Error bars indicate SD (n=3), \*\* $p <$  0.01, \*\*\*\* $p <$  0.0001. F)  
470 Kasumi-1 cells transfected with Renilla-targeting shRNA (shControl) and RUNX1-ETO targeting shRNA  
471 (shRUNX1-ETO). Error bars indicate SD (n=4), \* $p <$  0.05, \*\* $p <$  0.01, \*\*\* $p <$  0.001.

472 (G) ChIP-qPCR analysis of H3K9Ac occupancy at the URE in U937 cells with inducible expression of  
473 RUNX1-ETO (+/-: with/without induction). PCR amplicons include the URE (contains known RUNX1-  
474 binding motif at the URE) and GENE DESERT (a genome region that is devoid of protein-coding  
475 genes). Error bars indicate SD (n=3), \* $p <$  0.05.

476 (H) DNA pull-down assay showing binding of RUNX1-ETO to the RUNX1-binding motifs at the URE.  
477 Proteins captured by biotinylated DNA oligo containing RUNX1-binding motif in U937 nuclear lysate  
478 with inducible expression of RUNX1-ETO (+/-: with/without induction) were detected by immunoblot.

479

480 **SUPPLEMENTAL TABLE LEGENDS**

481 **Table S1. List of myeloid genes, Related to Figure 1.** 78 myeloid genes defined by their known  
482 roles in myeloid development or myeloid molecular markers.

483 **Table S2. List of myeloid genes displaying both RUNX1-RIP and RUNX1-ChIP peaks, Related to**  
484 **Figure 1.** 15 myeloid genes displaying both RUNX1-RIP and RUNX1-ChIP peaks defined by their  
485 known roles in myeloid development or myeloid molecular markers.

486 **Table S3. Table of oligonucleotide information.** Primers, probes, and sgRNAs for various assays  
487 used in this article.

488 **Table S4. List of enriched genes in *LOUP<sup>+</sup>/PU.1<sup>+</sup>* cells, Related to Figure 3.**

489 **Table S5. List of R1 with catRapid scores in RIP-seq data, Related to Figure 3.**

490 **Table S6. List of R2 with catRapid scores in RIP-seq data, Related to Figure 3.**

491

492 **QUANTITATION AND STATISTICAL ANALYSIS**

493 In general, quantitation and statistical tests were performed using GraphPad Prism 8.0 software.  
494 Data are shown as mean  $\pm$  SD. The paired two-tailed Student's t-test (otherwise specified in respective  
495 figure legends) was used to calculate statistical significance of differences between two experimental  
496 groups.  $p \leq 0.05$  was considered statistically significant.

497

498 **DATA SETS**

499 Data are available on the Gene Expression Omnibus database under GEO Series accession  
500 number GEO: [GSE140459](https://www.ncbi.nlm.nih.gov/geo/query/acc.cgi?acc=GSE140459).

501

502 **CONTACT FOR REAGENT AND RESOURCE SHARING**

503 Further information and request for resources and reagents should be directed to and will be  
504 fulfilled by the Lead Contacts, Daniel G. Tenen ([daniel.tenen@nus.edu.sg](mailto:daniel.tenen@nus.edu.sg)) and Bon Q. Trinh  
505 ([btrinh@bidmc.harvard.edu](mailto:btrinh@bidmc.harvard.edu))

506 **SUPPLEMENTAL REFERENCES**

- 507 1. Trinh BQ, Barengo N, Kim SB, Lee JS, Zweidler-McKay PA, Naora H. The homeobox gene DLX4  
508 regulates erythro-megakaryocytic differentiation by stimulating IL-1beta and NF-kappaB signaling. *J*  
509 *Cell Sci.* 2015;128(16):3055-3067.
- 510 2. Fellmann C, Hoffmann T, Sridhar V, et al. An optimized microRNA backbone for effective single-copy  
511 RNAi. *Cell Rep.* 2013;5(6):1704-1713.
- 512 3. Jinek M, Chylinski K, Fonfara I, Hauer M, Doudna JA, Charpentier E. A programmable dual-RNA-  
513 guided DNA endonuclease in adaptive bacterial immunity. *Science.* 2012;337(6096):816-821.
- 514 4. Jiang W, Bikard D, Cox D, Zhang F, Marraffini LA. RNA-guided editing of bacterial genomes using  
515 CRISPR-Cas systems. *Nat Biotechnol.* 2013;31(3):233-239.
- 516 5. Aubrey BJ, Kelly GL, Kueh AJ, et al. An inducible lentiviral guide RNA platform enables the  
517 identification of tumor-essential genes and tumor-promoting mutations in vivo. *Cell Rep.*  
518 2015;10(8):1422-1432.
- 519 6. Park J, Bae S, Kim JS. Cas-Designer: a web-based tool for choice of CRISPR-Cas9 target sites.  
520 *Bioinformatics.* 2015;31(24):4014-4016.
- 521 7. Li Y, Okuno Y, Zhang P, et al. Regulation of the PU.1 gene by distal elements. *Blood.*  
522 2001;98(10):2958-2965.
- 523 8. Hsiao TTM, Kelsey Waite, Joyce Yang, Reed Kelso, Kevin Holden, Rich Stoner. Inference of  
524 CRISPR Edits from Sanger Trace Data  
525 . *BioRxiv.* 2018.
- 526 9. Wang L, Gural A, Sun XJ, et al. The leukemogenicity of AML1-ETO is dependent on site-specific  
527 lysine acetylation. *Science.* 2011;333(6043):765-769.
- 528 10. Ran FA, Hsu PD, Wright J, Agarwala V, Scott DA, Zhang F. Genome engineering using the  
529 CRISPR-Cas9 system. *Nat Protoc.* 2013;8(11):2281-2308.
- 530 11. Konermann S, Brigham MD, Trevino AE, et al. Genome-scale transcriptional activation by an  
531 engineered CRISPR-Cas9 complex. *Nature.* 2015;517(7536):583-588.
- 532 12. Burel SA, Harakawa N, Zhou L, Pabst T, Tenen DG, Zhang DE. Dichotomy of AML1-ETO functions:  
533 growth arrest versus block of differentiation. *Mol Cell Biol.* 2001;21(16):5577-5590.
- 534 13. Pabst T, Mueller BU, Harakawa N, et al. AML1-ETO downregulates the granulocytic differentiation  
535 factor C/EBPalpha in t(8;21) myeloid leukemia. *Nat Med.* 2001;7(4):444-451.
- 536 14. Lee S, Kopp F, Chang TC, et al. Noncoding RNA NORAD Regulates Genomic Stability by  
537 Sequestering PUMILIO Proteins. *Cell.* 2016;164(1-2):69-80.
- 538 15. Livak KJ, Schmittgen TD. Analysis of relative gene expression data using real-time quantitative  
539 PCR and the 2(-Delta Delta C(T)) Method. *Methods.* 2001;25(4):402-408.
- 540 16. Zhang H, Alberich-Jorda M, Amabile G, et al. Sox4 is a key oncogenic target in C/EBPalpha mutant  
541 acute myeloid leukemia. *Cancer Cell.* 2013;24(5):575-588.
- 542 17. Zhang P, Iwasaki-Arai J, Iwasaki H, et al. Enhancement of hematopoietic stem cell repopulating  
543 capacity and self-renewal in the absence of the transcription factor C/EBP alpha. *Immunity.*  
544 2004;21(6):853-863.
- 545 18. Mueller BU, Pabst T, Fos J, et al. ATRA resolves the differentiation block in t(15;17) acute myeloid  
546 leukemia by restoring PU.1 expression. *Blood.* 2006;107(8):3330-3338.
- 547 19. Melo CA, Drost J, Wijchers PJ, et al. eRNAs are required for p53-dependent enhancer activity and  
548 gene transcription. *Mol Cell.* 2013;49(3):524-535.
- 549 20. Hagege H, Klous P, Braem C, et al. Quantitative analysis of chromosome conformation capture  
550 assays (3C-qPCR). *Nat Protoc.* 2007;2(7):1722-1733.
- 551 21. Staber PB, Zhang P, Ye M, et al. Sustained PU.1 levels balance cell-cycle regulators to prevent  
552 exhaustion of adult hematopoietic stem cells. *Mol Cell.* 2013;49(5):934-946.
- 553 22. Deng W, Blobel GA. Detecting Long-Range Enhancer-Promoter Interactions by Quantitative  
554 Chromosome Conformation Capture. *Methods Mol Biol.* 2017;1468:51-62.
- 555 23. Chu C, Quinn J, Chang HY. Chromatin isolation by RNA purification (ChIRP). *J Vis Exp.* 2012(61).
- 556 24. Trimarchi T, Bilal E, Ntziachristos P, et al. Genome-wide mapping and characterization of Notch-  
557 regulated long noncoding RNAs in acute leukemia. *Cell.* 2014;158(3):593-606.

- 558 25. Trinh BQ, Barengo N, Naora H. Homeodomain protein DLX4 counteracts key transcriptional control  
559 mechanisms of the TGF-beta cytostatic program and blocks the antiproliferative effect of TGF-beta.  
560 *Oncogene*. 2011;30(24):2718-2729.
- 561 26. Tsai MC, Manor O, Wan Y, et al. Long noncoding RNA as modular scaffold of histone modification  
562 complexes. *Science*. 2010;329(5992):689-693.
- 563 27. Bellucci M, Agostini F, Masin M, Tartaglia GG. Predicting protein associations with long noncoding  
564 RNAs. *Nat Methods*. 2011;8(6):444-445.
- 565 28. Quinlan AR, Hall IM. BEDTools: a flexible suite of utilities for comparing genomic features.  
566 *Bioinformatics*. 2010;26(6):841-842.
- 567 29. Hendrickson GD, Kelley DR, Tenen D, Bernstein B, Rinn JL. Widespread RNA binding by  
568 chromatin-associated proteins. *Genome Biol*. 2016;17:28.
- 569 30. Mikkelsen TS, Ku M, Jaffe DB, et al. Genome-wide maps of chromatin state in pluripotent and  
570 lineage-committed cells. *Nature*. 2007;448(7153):553-560.
- 571 31. Bolger AM, Lohse M, Usadel B. Trimmomatic: a flexible trimmer for Illumina sequence data.  
572 *Bioinformatics*. 2014;30(15):2114-2120.
- 573 32. Dobin A, Davis CA, Schlesinger F, et al. STAR: ultrafast universal RNA-seq aligner. *Bioinformatics*.  
574 2013;29(1):15-21.
- 575 33. Ramirez F, Ryan DP, Gruning B, et al. deepTools2: a next generation web server for deep-  
576 sequencing data analysis. *Nucleic Acids Res*. 2016;44(W1):W160-165.
- 577 34. Heinz S, Benner C, Spann N, et al. Simple combinations of lineage-determining transcription factors  
578 prime cis-regulatory elements required for macrophage and B cell identities. *Mol Cell*. 2010;38(4):576-  
579 589.
- 580 35. Hunt SE, McLaren W, Gil L, et al. Ensembl variation resources. *Database (Oxford)*. 2018;2018.
- 581 36. Andrews S. FastQC: a Quality Control Tool for High Throughput Sequence Data. Babraham  
582 Bioinformatics version 0115; 2016.
- 583 37. Krueger F. Trim Galore: A wrapper script to automate quality and adapter trimming as well as  
584 quality control. 045. Babraham Bioinformatics  
585 ; 2017.
- 586 38. Zheng R, Wan C, Mei S, et al. Cistrome Data Browser: expanded datasets and new tools for gene  
587 regulatory analysis. *Nucleic Acids Res*. 2019;47(D1):D729-D735.
- 588 39. de Rie D, Abugessaisa I, Alam T, et al. An integrated expression atlas of miRNAs and their  
589 promoters in human and mouse. *Nat Biotechnol*. 2017;35(9):872-878.
- 590 40. Patro R, Duggal G, Love MI, Irizarry RA, Kingsford C. Salmon provides fast and bias-aware  
591 quantification of transcript expression. *Nat Methods*. 2017;14(4):417-419.
- 592 41. Lun AT, McCarthy DJ, Marioni JC. A step-by-step workflow for low-level analysis of single-cell RNA-  
593 seq data with Bioconductor. *F1000Res*. 2016;5:2122.
- 594 42. Wolock SL, Lopez R, Klein AM. Scrublet: Computational Identification of Cell Doublets in Single-  
595 Cell Transcriptomic Data. *Cell Syst*. 2019;8(4):281-291 e289.
- 596 43. Lun AT, Bach K, Marioni JC. Pooling across cells to normalize single-cell RNA sequencing data  
597 with many zero counts. *Genome Biol*. 2016;17:75.
- 598 44. Kharchenko PV, Silberstein L, Scadden DT. Bayesian approach to single-cell differential expression  
599 analysis. *Nat Methods*. 2014;11(7):740-742.
- 600 45. Weinreb C, Wolock S, Klein AM. SPRING: a kinetic interface for visualizing high dimensional single-  
601 cell expression data. *Bioinformatics*. 2018;34(7):1246-1248.
- 602 46. Martens JH, Stunnenberg HG. BLUEPRINT: mapping human blood cell epigenomes.  
603 *Haematologica*. 2013;98(10):1487-1489.
- 604 47. Consortium EP. An integrated encyclopedia of DNA elements in the human genome. *Nature*.  
605 2012;489(7414):57-74.
- 606 48. Aran D, Looney AP, Liu L, et al. Reference-based analysis of lung single-cell sequencing reveals a  
607 transitional profibrotic macrophage. *Nat Immunol*. 2019;20(2):163-172.
- 608 49. Dennis G, Jr., Sherman BT, Hosack DA, et al. DAVID: Database for Annotation, Visualization, and  
609 Integrated Discovery. *Genome Biol*. 2003;4(5):P3.



- 610 50. Lin MF, Jungreis I, Kellis M. PhyloCSF: a comparative genomics method to distinguish protein  
611 coding and non-coding regions. *Bioinformatics*. 2011;27(13):i275-282.  
612 51. West JA, Davis CP, Sunwoo H, et al. The long noncoding RNAs NEAT1 and MALAT1 bind active  
613 chromatin sites. *Mol Cell*. 2014;55(5):791-802.  
614
